1 **ZEB1 insufficiency causes corneal endothelial cell state transition and altered cellular**  
2 **processing**

3

4 Ricardo F. Frausto<sup>1</sup>, Doug D. Chung<sup>1</sup>, Payton M. Boere<sup>1</sup>, Vinay S. Swamy<sup>1</sup>, Huong N.V.  
5 Duong<sup>1,2</sup>, Liyo Kao<sup>3</sup>, Rustam Azimov<sup>3</sup>, Wenlin Zhang<sup>1</sup>, Liam Carrigan<sup>4</sup>, Davey Wong<sup>4</sup>, Marco  
6 Morselli<sup>5,6</sup>, Marina Zakharevich<sup>1</sup>, E. Maryam Hanser<sup>1</sup>, Austin C. Kassels<sup>1</sup>, Ira Kurtz<sup>3,7</sup>, Matteo  
7 Pellegrini<sup>5,6,8,9</sup> and Anthony J. Aldave<sup>1\*</sup>

8

9 <sup>1</sup>The Stein Eye Institute, David Geffen School of Medicine at UCLA, Los Angeles, California,  
10 United States of America

11

12 <sup>2</sup>Department of Ophthalmology, University of Medicine and Pharmacy, Ho Chi Minh City,  
13 Vietnam

14

15 <sup>3</sup>Division of Nephrology, David Geffen School of Medicine at UCLA, Los Angeles, California,  
16 United States of America

17

18 <sup>4</sup>Department of Statistics, UCLA, Los Angeles, California, United States of America

19

20 <sup>5</sup>Department of Molecular, Cell and Developmental Biology, UCLA, Los Angeles, California,  
21 United States of America

22

23 <sup>6</sup>Institute for Quantitative and Computational Biology, UCLA, Los Angeles, California, United  
24 States of America

25

26 <sup>7</sup>Brain Research Institute, UCLA, Los Angeles, California, United States of America

27

28 <sup>8</sup>Molecular Biology Institute, UCLA, Los Angeles, California, United States of America

29

30 <sup>9</sup>Jonsson Comprehensive Cancer Center, UCLA, Los Angeles, California, United States of  
31 America

32

33 Corresponding author

34 Email: [aldave@jsei.ucla.edu](mailto:aldave@jsei.ucla.edu) (AJA)

## ZEB1 and corneal endothelial cell biology

35

### ABSTRACT

36 The zinc finger e-box binding homeobox 1 (ZEB1) transcription factor is a master regulator of  
37 the epithelial to mesenchymal transition (EMT), and of the reverse mesenchymal to epithelial  
38 transition (MET) processes. ZEB1 plays an integral role in mediating cell state transitions during  
39 cell lineage specification, wound healing and disease. EMT/MET are characterized by distinct  
40 changes in molecular and cellular phenotype that are generally context-independent. Posterior  
41 polymorphous corneal dystrophy (PPCD), associated with ZEB1 insufficiency, provides a new  
42 biological context in which to understand and evaluate the classic EMT/MET paradigm. PPCD is  
43 characterized by a cadherin-switch and transition to an epithelial-like transcriptomic and cellular  
44 phenotype, which we study in a cell-based model of PPCD generated using CRISPR-Cas9-  
45 mediated ZEB1 knockout in corneal endothelial cells (CEnCs). Transcriptomic and functional  
46 studies support the hypothesis that CEnC undergo a MET-like transition in PPCD, termed  
47 endothelial to epithelial transition (EnET), and lead to the conclusion that EnET may be  
48 considered a corollary to the classic EMT/MET paradigm.

49

## ZEB1 and corneal endothelial cell biology

50

### INTRODUCTION

51 The zinc finger e-box binding homeobox 1 (*ZEB1*) gene encodes a transcription factor involved  
52 in epithelial and endothelial cell plasticity critical in development, wound healing and cancer [1].  
53 *ZEB1* is a master regulator of cell state transitions (CSTs), namely epithelial to mesenchymal  
54 (EMT) or the reverse process, mesenchymal to epithelial (MET). EMT is characterized by  
55 distinct molecular and morphologic changes in which epithelial cells lose an epithelial-associated  
56 gene expression profile, apicobasal polarity and intercellular adhesions, and gain a mesenchymal-  
57 associated gene expression profile and increased migratory capacity. Conversely, the reverse of  
58 the EMT process effectively characterizes MET. EMT and MET are tightly regulated CST  
59 processes involving the regulation of many genes in a cell-type-independent manner, and for  
60 which stable transition states have been identified [2-7]. For example, the cadherin-switch, a well-  
61 described feature of EMT, involves the repression of cadherin 1 (*CDH1*; E-cadherin) and  
62 activation of cadherin 2 (*CDH2*; N-cadherin) gene expression, with the reverse being observed in  
63 MET. In addition, an inverse correlation is observed between the mesenchymal-associated  
64 transcription factor *ZEB1* and two epithelial-associated transcription factors, ovo-like 2 (*OVOL2*)  
65 and grainy head-like transcription factor 2 (*GRHL2*), known to directly repress *ZEB1*  
66 transcription [6, 8-10].

67 The corneal endothelium is present on the internal surface of the cornea, which is  
68 comprised of three cell types: the external corneal epithelium, the central connective tissue  
69 containing a “resting” fibroblast-like cell type (i.e., keratocytes), and the corneal endothelium.  
70 The corneal endothelium demonstrates an epithelial organization (i.e., simple squamous  
71 epithelium), and expresses both epithelial- and mesenchymal-associated genes [11]. Nevertheless,  
72 corneal endothelial cells (CEnC) are considered distinct from most epithelial cell types due to  
73 their embryonic origin, unique function and gene expression profile [11]. Therefore, based on  
74 anatomic, transcriptomic and functional classification criteria, CEnC may be considered a stable  
75 transition cell state between epithelial and mesenchymal cell states. However, this hypothesis

## ZEB1 and corneal endothelial cell biology

76 remains to be tested, and the classification of CEnC in the context of EMT and MET may be  
77 revealed by the important role that ZEB1 plays in the maintenance of the CEnC phenotype.

78       Posterior polymorphous corneal dystrophy (PPCD) is an autosomal dominant inherited  
79 disorder of the corneal endothelium that is characterized by progressive corneal edema and  
80 reduced visual acuity. Approximately 30% of affected individuals demonstrate a monoallelic  
81 mutation of the *ZEB1* gene, resulting in ZEB1 insufficiency [12]. A smaller percentage of  
82 affected individuals demonstrate non-coding mutations in *OVOL2* and *GRHL2*, presumably as a  
83 result of ectopic expression of either gene in the corneal endothelium, with subsequent repression  
84 of *ZEB1* transcription [13-16]. As a consequence of ZEB1 insufficiency, various epithelial-like  
85 features are observed in PPCD corneal endothelium, including a stratified organization,  
86 desmosomal intracellular junctions, and expression of an epithelial-like transcriptomic profile,  
87 including increased/ectopic expression of epithelial-associated keratins and cadherins (e.g.,  
88 *CDHI*), and decreased expression of *CDH2* [12, 17, 18]. Recently we reported that reduced  
89 ZEB1 expression in a cell-based model of PPCD using short-interfering RNA (siRNA) targeting  
90 ZEB1 resulted in significantly increased CEnC apoptosis and barrier function [18], consistent  
91 with prior reports of ZEB1 reduction leading to increased cell death [19, 20] and increased cell  
92 barrier function [21-23]. These results provided the first experimental evidence that the corneal  
93 endothelium in individuals with PPCD may be characterized by an epithelial-like phenotype not  
94 just in form but in function as well. However, given the obvious limitations of using transient  
95 siRNA-mediated ZEB1 knockdown to study a condition associated with chronic ZEB1  
96 insufficiency, we generated a constitutive and stable knockdown of ZEB1 protein in an  
97 immortalized corneal endothelial cell line utilizing the clustered regularly interspaced short  
98 palindromic repeats (CRISPR)-Cas9 gene-editing technology. Herein, we validated the *ZEB1*  
99 monoallelic knockout cell line as a cell-based model of PPCD using a transcriptomics approach,  
100 and provide evidence (transcriptomic and cell function) to support our hypothesis that a novel  
101 MET-like process, termed endothelial to epithelial transition (EnET), best explains the PPCD

## ZEB1 and corneal endothelial cell biology

102 phenotype. Importantly, key findings from the transcriptomic profiling of human PPCD  
103 endothelium [17] were recapitulated in the ZEB1 knockout cell line, further supporting the utility  
104 of the CRISPR-Cas9-mediated knockout of ZEB1 in CEnC to gain a better understanding of the  
105 molecular factors central to the pathogenesis of PPCD. In addition, based on the evidence  
106 provided here for EnET, we propose a corollary to the EMT/MET paradigm, in which EnET is  
107 classified as a MET subtype that is characteristic of PPCD.

108

## ZEB1 and corneal endothelial cell biology

109

### RESULTS

110 **Transcriptomic analysis validates the *ZEB1*<sup>+/-</sup> CEnC line as a viable cell-based model of**  
111 **PPCD**

112 We developed a *ZEB1*<sup>+/-</sup> CEnC line to examine the effects of the monoallelic knockout of *ZEB1*  
113 on various cellular processes. The mutation introduced by non-homologous end joining repair is a  
114 frameshift that generated a premature stop codon, similar to many *ZEB1* mutations associated  
115 with PPCD3. Prior to utilizing the CEnC line to study the effects of ZEB1 knockout on cellular  
116 processes, we determined the extent to which the line recapitulated one of the primary molecular  
117 hallmarks of PPCD endothelium: an ectopic/increased expression of epithelial-specific (and/or  
118 associated) genes (Fig 1A). We identified 1715 differentially expressed genes in PPCD  
119 endothelium compared to age-matched controls, of which 920 were upregulated and 795 were  
120 downregulated [17]. Comparison of the differentially expressed genes in PPCD with genes  
121 highly-associated with ex vivo corneal epithelial cells (evCEpC) or with ex vivo corneal  
122 endothelial cells (evCEnC) demonstrated that 26% (65/249) of evCEpC genes were upregulated  
123 and 37% (40/108) of evCEnC genes were downregulated in PPCD endothelium, significantly  
124 different from the expected percentages due to chance alone ( $p < 0.01$ ) (Fig 1A and S1 Fig).

## ZEB1 and corneal endothelial cell biology

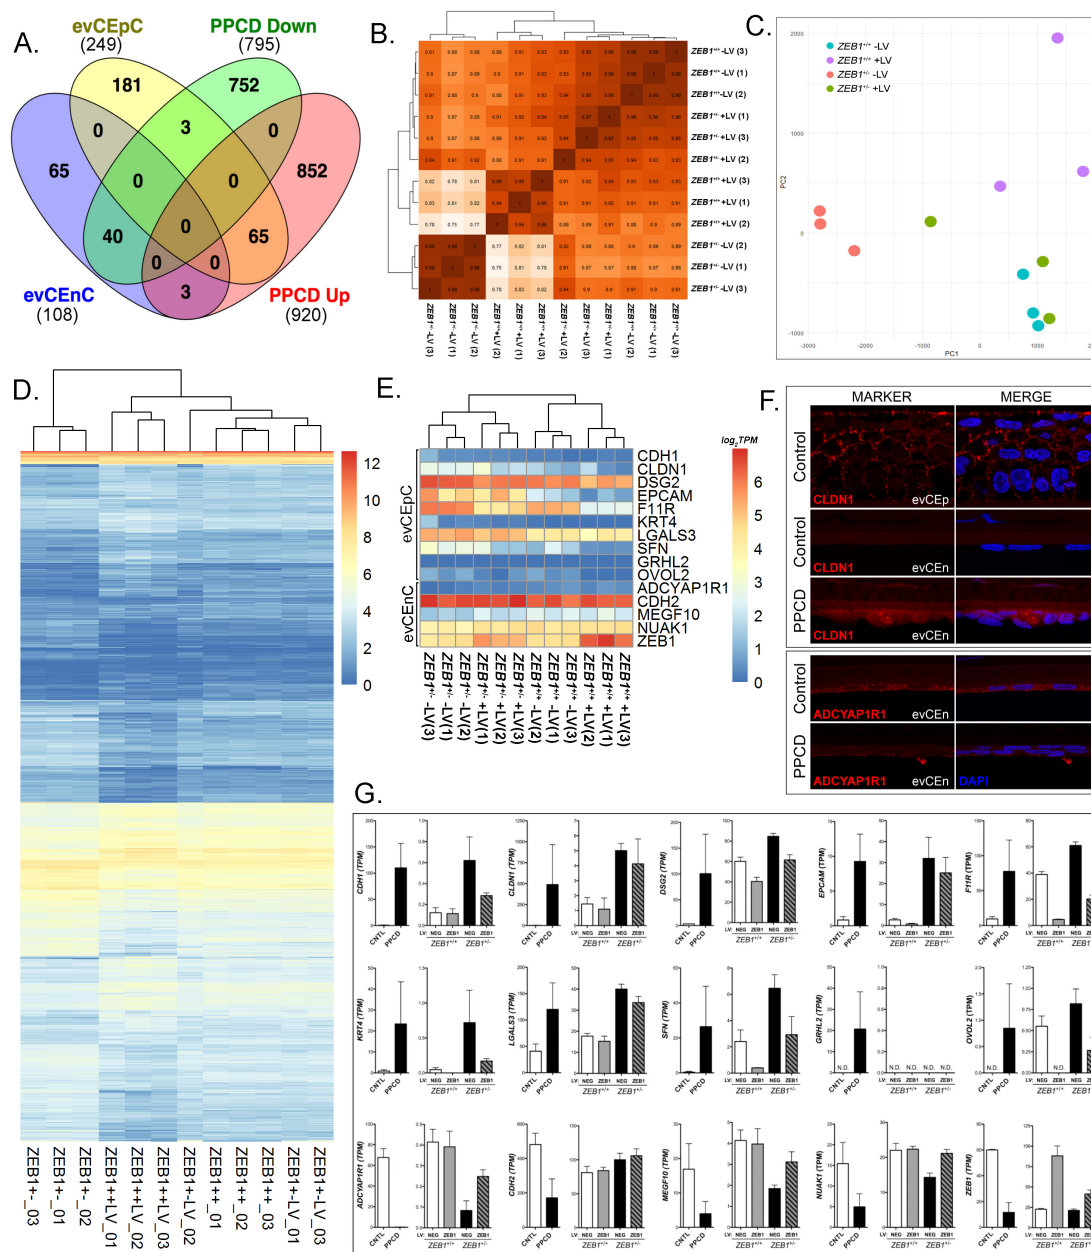

125

126 **Fig 1. Transcriptomic analysis of the *ZEB1*<sup>+/-</sup> CEnC line validates it as a model of PPCD.** (A) Venn  
 127 diagram comparing genes specifically expressed by ex vivo corneal epithelial cells (evCEpC) and ex vivo  
 128 corneal endothelial cells (evCEnC) with differentially expressed genes in PPCD. (B) Spearman correlation  
 129 heat map, (C) principle component analysis, and (D) heat map demonstrating clustering analysis of the four  
 130 *ZEB1* CEnC lines and a combined list of 2222 genes that showed significant differential expression in at  
 131 least one of the three cell lines (*ZEB1*<sup>+/+</sup> +LV, *ZEB1*<sup>+/-</sup> -LV, and *ZEB1*<sup>+/-</sup> +LV) compared with *ZEB1*<sup>+/+</sup>. (E)  
 132 Hierarchical clustering heat map of selected epithelial- and endothelial-specific genes and *ZEB1* CEnC  
 133 lines. (F) Immunofluorescence showing expression of the epithelial-associated protein CLDN1 and the  
 134 corneal endothelial-associated protein ADCYAP1R1 in PPCD endothelium. Expression of CLDN1 in  
 135 corneal epithelium (evCEp) was used as a positive control. CLDN1 and ADCYAP1R1 were visualized  
 136 with Alexafluor 594 (red), and nuclei were stained with DAPI (blue). (G) Bar graphs showing the  
 137 expression of selected epithelial- and endothelial-specific genes (see (E)) in PPCD endothelium and in the  
 138 *ZEB1* CEnC lines. Gene expression is given in TPMs.

## ZEB1 and corneal endothelial cell biology

139

140 To study the effects of reconstitution of ZEB1 expression on the corneal endothelial  
141 transcriptome, we generated stable transgenic *ZEB1*<sup>+/+</sup> and *ZEB1*<sup>+/-</sup> cell lines expressing  
142 exogenous ZEB1 by the introduction of *ZEB1* cDNA using lentivirus containing the transgene.  
143 Three independent cell clones for each of the four cell lines (*ZEB1*<sup>+/+</sup> -LV, *ZEB1*<sup>+/+</sup> +LV, *ZEB1*<sup>+/-</sup>  
144 -LV and *ZEB1*<sup>+/-</sup> +LV) were generated for a total of 12 samples. To examine the relationship of  
145 the four *ZEB1* CEnC lines to each other we compared a list of 2222 differentially expressed genes  
146 (defined by differential expression in one or more of three cell lines (*ZEB1*<sup>+/+</sup> +LV, *ZEB1*<sup>+/-</sup> -LV  
147 and *ZEB1*<sup>+/-</sup> +LV) compared to the reference cell line (*ZEB1*<sup>+/+</sup> -LV)) to all genes expressed in the  
148 12 samples by Spearman correlation (Fig 1B). The *ZEB1*<sup>+/+</sup> -LV and the *ZEB1*<sup>+/-</sup> -LV groups  
149 showed a correlation of ~0.89. Reconstitution of the *ZEB1*<sup>+/-</sup> cell line with ZEB1 (*ZEB1*<sup>+/-</sup> +LV)  
150 increased its correlation with *ZEB1*<sup>+/+</sup> -LV to ~0.95, the highest correlation between any two  
151 groups. The lowest correlation was demonstrated between the *ZEB1*<sup>+/-</sup> -LV and *ZEB1*<sup>+/+</sup> +LV cell  
152 lines, where the difference in ZEB1 abundance is the greatest, with a correlation of ~0.79.  
153 Principle component analysis was also used to assess the relationship of the samples to each other  
154 based on the expression of the 2222 genes defined as differentially expressed (Fig 1C). In general,  
155 the three samples from each group clustered with each other. While distinct clusters for the  
156 *ZEB1*<sup>+/+</sup> -LV, *ZEB1*<sup>+/-</sup> -LV and *ZEB1*<sup>+/+</sup> +LV were observed, the *ZEB1*<sup>+/-</sup> +LV were clustered  
157 more closely to the to the *ZEB1*<sup>+/+</sup> -LV cells than the other two groups. Hierarchical clustering  
158 and heatmap of the 12 samples demonstrated similar results to those observed with Spearman  
159 correlation and PCA, where the *ZEB1*<sup>+/+</sup> -LV and *ZEB1*<sup>+/-</sup> -LV groups demonstrate distinct  
160 clusters, with the *ZEB1*<sup>+/-</sup> +LV group having a stronger association with the *ZEB1*<sup>+/+</sup> -LV group  
161 (Fig 1D).

162 To determine if the *ZEB1*<sup>+/-</sup> CEnC line sufficiently recapitulates the epithelial-like gene  
163 expression observed in PPCD3, we compared the expression of a random selection of corneal  
164 epithelial- (*CDH1*, *CLDN1*, *DSG2*, *EPCAM*, *F11R*, *KRT4*, *LGALS3*, *SFN*, *GRHL2* and *OVOL2*)



## ZEB1 and corneal endothelial cell biology

165 and endothelial- (*ADCYAP1R1*, *CDH2*, *MEGF10*, *NUAK1*, *ZEB1*) associated genes that are  
166 differentially expressed in PPCD across the four CEnC lines (Fig 1E). Hierarchical clustering  
167 analysis of the four *ZEB1* CEnC groups against the 15 selected genes demonstrated that the  
168 samples within each group clustered together, but the two main branches clustered based on the  
169 *ZEB1* genotype (*ZEB1*<sup>+/+</sup> or *ZEB1*<sup>+/-</sup>). Although the differential expression of the selected corneal  
170 epithelial- or endothelial-associated genes in PPCD was previously identified (Fig 1A), the  
171 expression of the encoded protein has not been determined for a majority of these genes. Due to  
172 the scarcity of corneal endothelial tissue from affected individuals, we assessed protein  
173 expression of one epithelial-associated protein, claudin 1 (*CLDN1*), and of one endothelial-  
174 associated protein, adenylate cyclase activating polypeptide 1 receptor type 1 (*ADCYAP1R1*), in  
175 PPCD endothelium (Fig 1F). While ectopic *CLDN1* expression was observed in PPCD  
176 endothelium, *ADCYAP1R1* expression was markedly decreased in PPCD endothelium compared  
177 with normal endothelium. Ninety percent (9/10) of the selected corneal epithelial-associated  
178 genes showing increased/ectopic expression in PPCD endothelium also demonstrated  
179 increased/ectopic expression in *ZEB1*<sup>+/-</sup> -LV cells; *GRHL2* was not expressed (Fig 1G). Similarly,  
180 eighty percent (4/5) of the corneal endothelial-associated genes showing decreased expression in  
181 PPCD endothelium also demonstrated decreased expression in *ZEB1*<sup>+/-</sup> -LV cells; *CDH2*  
182 expression was increased.

183

### 184 **ZEB1 insufficiency induces morphologic changes in cultured CEnC**

185 The effects of *ZEB1* insufficiency on cell morphology were analyzed using phase-contrast  
186 microscopy (Fig 2). Cells for each cloned line were examined at sub-confluent (Fig 2A) and  
187 confluent densities (Fig 2B). Most of the sub-confluent *ZEB1*<sup>+/+</sup> -LV cells demonstrated a  
188 cobblestone-like morphology with a few cells demonstrating bipolar morphology. In contrast, the  
189 sub-confluent *ZEB1*<sup>+/-</sup> -LV cells demonstrated a polygonal/cobblestone-like morphology, no  
190 bipolar morphology and grew in discrete patches. The sub-confluent *ZEB1*<sup>+/-</sup> +LV cells, which

## ZEB1 and corneal endothelial cell biology

191 were reconstituted with ZEB1, demonstrated morphologic characteristics similar to the *ZEB1*<sup>+/+</sup> -  
 192 LV cells.

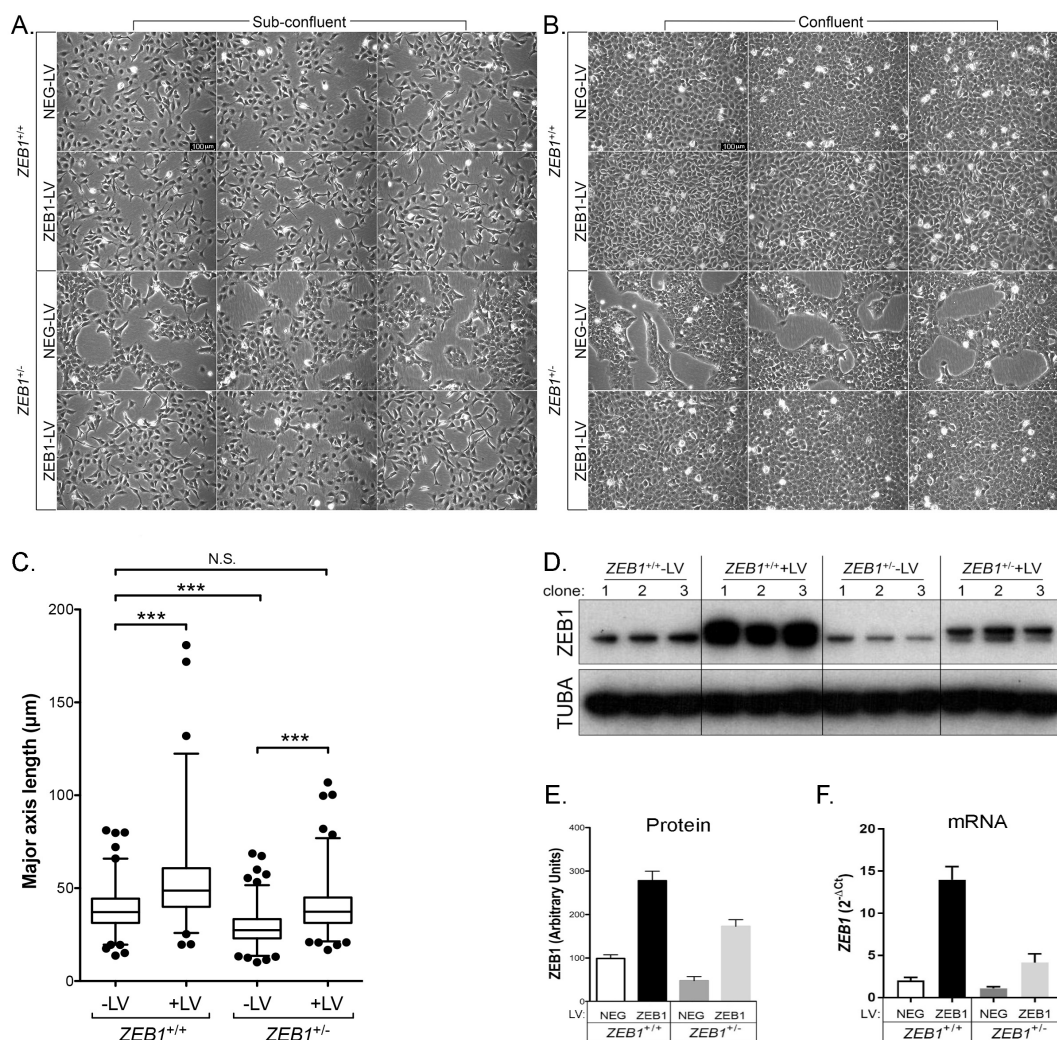

193

194 **Fig 2. ZEB1 regulates CEnC morphology in a manner consistent with EMT.** (A) Sub-confluent  
 195 cultures established 1 day after seeding of the two control and two *ZEB1* transgenic CEnC lines with each  
 196 genotype (*ZEB1*<sup>+/+</sup> -LV, *ZEB1*<sup>+/+</sup> +LV, *ZEB1*<sup>+/-</sup> -LV and *ZEB1*<sup>+/-</sup> +LV) represented by three independent  
 197 clones (individual images). (B) Confluent cultures of cell line clones shown in (A) established 3 days post-  
 198 seeding. Scale bars in (A) and (B) represent 100 μm distance. (C) Box and whiskers plot showing the cell  
 199 major axis length (MAL) distribution for each of the CEnC lines. MAL was used to assess cell morphology  
 200 as a measure of cell state phenotype. Note that a relatively short MAL is indicative of an epithelial-like  
 201 phenotype, while a relatively long MAL is indicative of a mesenchymal-like phenotype. Box encompasses  
 202 50% of data points, line in box is the median of the MAL and whiskers encompass 98% of data points  
 203 (n=357-688). Comparisons of the MAL for the CEnC lines were performed using one-way ANOVA with  
 204 post-hoc Tukey test. \*\*\*, P < 0.001; N.S., not significant (p > 0.05). (D) Western blot showing ZEB1 levels  
 205 in the twelve clones (3 independent clones per genotype) used in this study. Alpha-tubulin (TUBA)  
 206 was used as a loading control. (E) ZEB1 protein abundance was determined by densitometric analysis of  
 207 Western blot data shown in (D). Quantification data are represented as mean ± SEM (n=3). Bar graphs  
 208 showing ZEB1 protein (E) and *ZEB1* mRNA (F) abundances in the four CEnC lines. ZEB1 transcript  
 209 abundance was measured relative to GAPDH and plotted as 2<sup>-ΔCt</sup>.

## ZEB1 and corneal endothelial cell biology

210

211 Analysis of the transgenic cells at a time point where the clones from 3 of 4 cell groups  
212 established a confluent monolayer revealed morphologic changes in the *ZEB1*<sup>+/+</sup> +LV and *ZEB1*<sup>+/-</sup>  
213 -LV cells compared with the *ZEB1*<sup>+/+</sup> -LV cells (Fig 2B). Similar to the normal CEnC monolayer  
214 on the posterior surface of the cornea, CEnC in 2D culture form a monolayer of polygonal shaped  
215 cells, a characteristic observed in *ZEB1*<sup>+/+</sup> -LV cells. The *ZEB1*<sup>+/-</sup> -LV cells did not form a  
216 contiguous monolayer, but instead maintained distinct patches (albeit covering a larger area) of  
217 cell growth and robust cobblestone-like morphology. Reconstitution of the *ZEB1*<sup>+/-</sup> cells with  
218 ZEB1 (*ZEB1*<sup>+/-</sup> +LV) resulted in the formation of a contiguous monolayer reminiscent of the  
219 *ZEB1*<sup>+/+</sup> -LV confluent cells, thus re-establishing an endothelial-like phenotype without  
220 propelling them to a fibroblast-like phenotype, which occurred in *ZEB1*<sup>+/+</sup> cells in which ZEB1  
221 levels were augmented (i.e., *ZEB1*<sup>+/+</sup> +LV).

222 To assess for significant differences in the morphologic characteristics of the cells in each  
223 group, we measured the major-axis length (MAL) of each cell in the sub-confluent cultures for  
224 the three clones in each group and graphed the data as a box-plot (Fig 2C). We used the MAL of  
225 a cell as an indirect measure of the cell state within the epithelial to fibroblastic spectrum of cell  
226 states, so that a short MAL was characteristic of epithelial cell morphology and long MAL was  
227 characteristic of fibroblast cell morphology. *ZEB1*<sup>+/-</sup> -LV cells had a mean MAL of 28.6  $\mu\text{m}$   
228 (range: 10.1-68.7  $\mu\text{m}$ ), significantly less than the mean MAL for *ZEB1*<sup>+/+</sup> -LV (38.5  $\mu\text{m}$ ; range:  
229 13.7-81.1  $\mu\text{m}$ ) ( $p < 0.001$ ). Reconstitution of ZEB1 in the *ZEB1*<sup>+/-</sup> cells (*ZEB1*<sup>+/-</sup> +LV cells)  
230 resulted in a mean MAL of 39.4  $\mu\text{m}$  (range: 16.8-106.9  $\mu\text{m}$ ), significantly increased compared  
231 with the mean MAL for *ZEB1*<sup>+/-</sup> -LV cells ( $p < 0.001$ ), and not significantly different compared  
232 with the *ZEB1*<sup>+/+</sup> -LV cells ( $p > 0.05$ ). The mean MAL increased further to 53.0  $\mu\text{m}$  (range: 19.6-  
233 180.8  $\mu\text{m}$ ) in the *ZEB1*<sup>+/+</sup> +LV cells, significantly increased compared with the *ZEB1*<sup>+/+</sup> -LV cells

## ZEB1 and corneal endothelial cell biology

234 (p<0.001). Collectively, all of the observed morphologic changes were directly correlated with  
235 ZEB1 protein (Fig 2D and 2E) and *ZEB1* mRNA (Fig 2F) levels.

236

### 237 **Reduced ZEB1 levels lead to decreased CEnC migration capacity**

238 A non-wounding cell migration assay was performed to assess the effect of reduced ZEB1 levels  
239 on CEnC migration capacity (Fig 3). Phase-contrast microscopy demonstrated that reduction of  
240 ZEB1 (*ZEB1*<sup>+/-</sup> -LV) markedly reduced CEnC migration capacity (~24% gap closure) compared  
241 with control CEnC (*ZEB1*<sup>+/+</sup> -LV; ~83% gap closure; p<0.001). Reconstitution of *ZEB1*<sup>+/-</sup> cells  
242 with ZEB1 (*ZEB1*<sup>+/-</sup> +LV) appeared to rescue the attenuated migratory phenotype observed in  
243 *ZEB1*<sup>+/-</sup> -LV CEnC (p<0.001), with a gap closure (~74%) that was not significantly different from  
244 that in the *ZEB1*<sup>+/+</sup> -LV CEnCs (p>0.05). In contrast, augmentation of ZEB1 levels in *ZEB1*<sup>+/+</sup>  
245 cells (*ZEB1*<sup>+/+</sup>+LV) did not result in a significant increase in cell migration capacity (~84% gap  
246 closure) compared with *ZEB1*<sup>+/+</sup> -LV cells (~83% gap closure) (p>0.05).

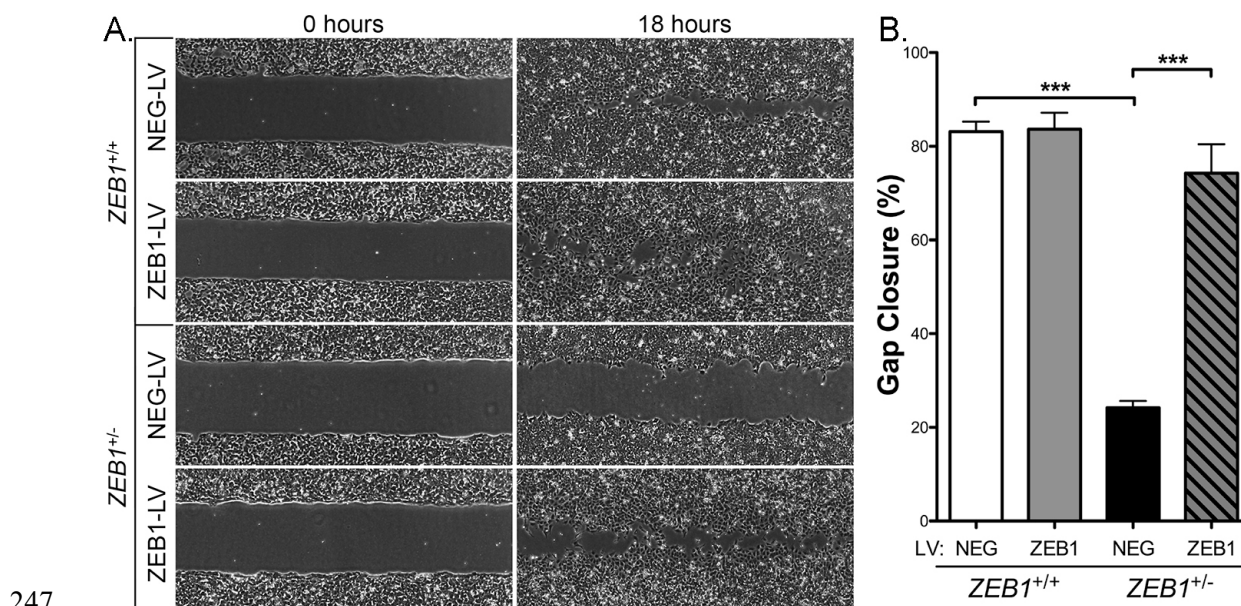

247

248 **Fig 3. ZEB1 reduction impairs CEnC migration capacity.** (A) Representative images at 0 hours  
249 showing a gap of ~500μm (width) and at 18 hours showing degree of cell gap closure (i.e., cell migration)  
250 for each of the control (*ZEB1*<sup>+/+</sup> NEG-LV and *ZEB1*<sup>+/-</sup> NEG-LV) and *ZEB1* transgenic (*ZEB1*<sup>+/+</sup> ZEB1-LV  
251 and *ZEB1*<sup>+/-</sup> ZEB1-LV) CEnC lines. (B) Bar graph showing percent of gap closure at 18 hours. Data are  
252 represented as the mean ±SEM (n=12). Comparisons were performed using one-way ANOVA with post-  
253 hoc Tukey test. \*\*\*, P<0.001.

## ZEB1 and corneal endothelial cell biology

254

### 255 **Reduced ZEB1 levels leads to decreased CEnC proliferation capacity**

256 To determine the effect that decreased ZEB1 has on CEnC proliferation, we measured cell  
257 proliferation in *ZEB1*<sup>+/+</sup> and *ZEB1*<sup>+/-</sup> cell lines with transient ZEB1 lentivirus transduction (Fig 4).  
258 Two days after transduction, some of the cells were re-seeded to assess cell proliferation while  
259 the remaining cells were lysed and prepared for Western blotting. ZEB1 Western blot confirmed  
260 the expected relative ZEB1 protein levels in each of the four groups (Fig 4A). Cells from the  
261 newly seeded cultures were collected at 3, 48, 72 and 96 hours and counted. A ratio ( $N_t/N_0$ ) of  
262 cell number at time t ( $N_t = 48, 72$  or 96 hours) versus the cell number at 3 hours (defined as the  
263 reference,  $N_0$ ) was graphed as a measure of cell proliferation (Fig 4B). At 72 and 96 hours, the  
264 *ZEB1*<sup>+/-</sup> -LV cells demonstrated significantly less cell proliferation compared with the *ZEB1*<sup>+/+</sup> -  
265 LV cells ( $p < 0.0001$ ). Reconstitution of *ZEB1*<sup>+/-</sup> cells with ZEB1 (*ZEB1*<sup>+/-</sup> +LV) resulted in a  
266 significant increase in cell proliferation at 72 hours ( $p < 0.5$ ) and 96 hours ( $p < 0.0001$ ) compared  
267 with *ZEB1*<sup>+/-</sup> -LV, returning to a level that was not significantly different from that of the *ZEB1*<sup>+/+</sup>  
268 -LV cells ( $p > 0.05$ ). Consistent with the above results, the *ZEB1*<sup>+/+</sup> +LV cells demonstrated a  
269 significant increase in proliferation compared with the *ZEB1*<sup>+/+</sup> -LV cells ( $p < 0.0001$ ).

## ZEB1 and corneal endothelial cell biology

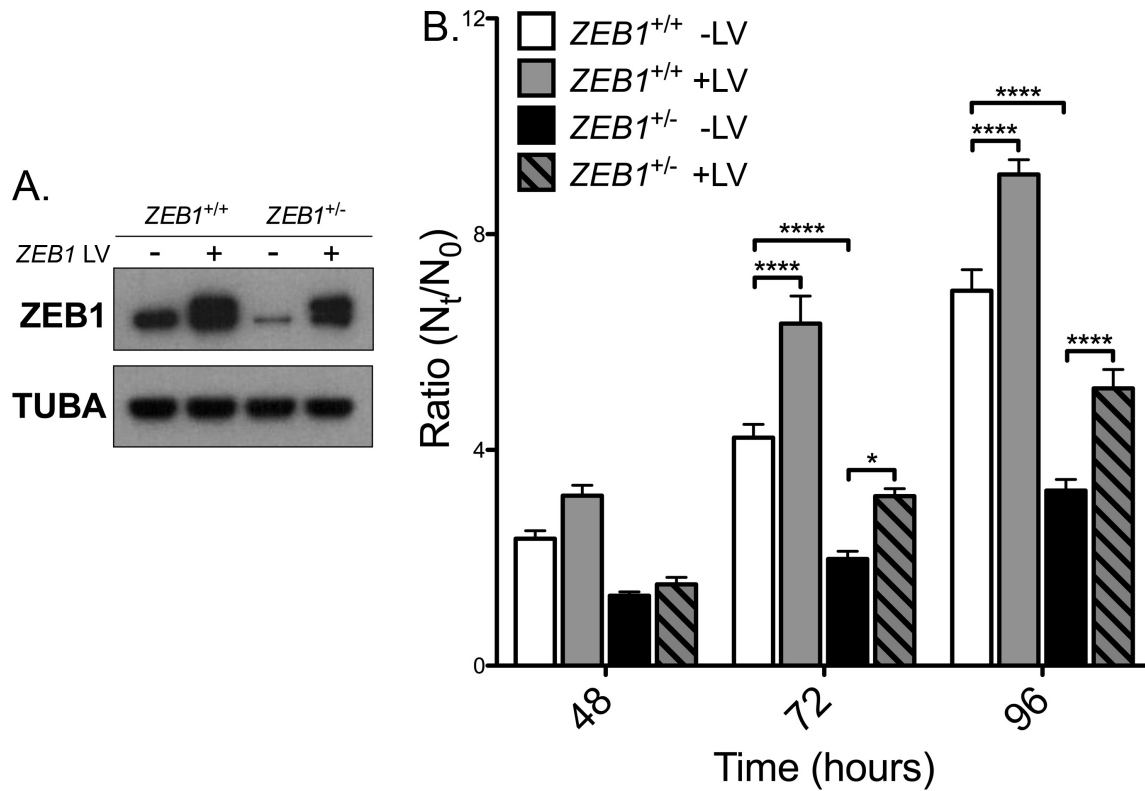

270

271 **Fig 4. ZEB1 reduction impairs CEnC proliferation capacity.** (A) Western blotting results showing  
 272 ZEB1 levels in each of the CEnC lines following transient ZEB1 overexpression with lentivirus (5 days  
 273 post-transduction). Alpha-tubulin (TUBA) was used as a loading control. (B) Bar graph showing cell  
 274 proliferation graphed as the ratio of cell number at time t ( $N_t$ ) over cell number at 3 hours ( $N_0$ ),  $N_t/N_0$ .  
 275 Ratios were calculated at 48, 72 and 96 hours post-seeding. Data were represented as the mean  $\pm$  SEM  
 276 ( $n=6$ ). Comparisons were performed using two-way ANOVA (genotype and time) with post-hoc  
 277 Bonferroni test. \*,  $P<0.05$ ; \*\*\*\*,  $P<0.0001$ .  
 278

### 279 ZEB1 insufficiency leads to increased CEnC barrier function

280 To measure the role that ZEB1 plays in CEnC barrier function, we used electric cell-substrate  
 281 impedance sensing (ECIS). Barrier function was monitored for 96 hours after initial seeding of  
 282 cells at 100% confluence (Fig 5). *ZEB1<sup>+/-</sup> -LV* CEnC demonstrated significantly increased  
 283 impedance (i.e., increased barrier function), compared with *ZEB1<sup>+/+</sup> -LV* cells ( $p<0.05$ ) (Fig 5A).  
 284 *ZEB1* reconstitution in *ZEB1<sup>+/-</sup>* (*ZEB1<sup>+/-</sup> +LV*) cells decreased CEnC barrier function to a level  
 285 that was not significantly different from that in *ZEB1<sup>+/+</sup> -LV* CEnC ( $p>0.05$ ). Similarly,  
 286 augmentation of ZEB1 levels in *ZEB1<sup>+/+</sup>* (*ZEB1<sup>+/+</sup> +LV*) cells resulted in a significant reduction in  
 287 barrier function compared with *ZEB1<sup>+/+</sup> -LV* CEnC ( $p<0.05$ ). Both cell-cell ( $R_b$ , Fig 5B) and cell-

## ZEB1 and corneal endothelial cell biology

288 substrate ( $\alpha$ , Fig 5C) adhesion were contributing factors to overall cell barrier function,

289 demonstrating an inverse relationship compared to ZEB1 levels.

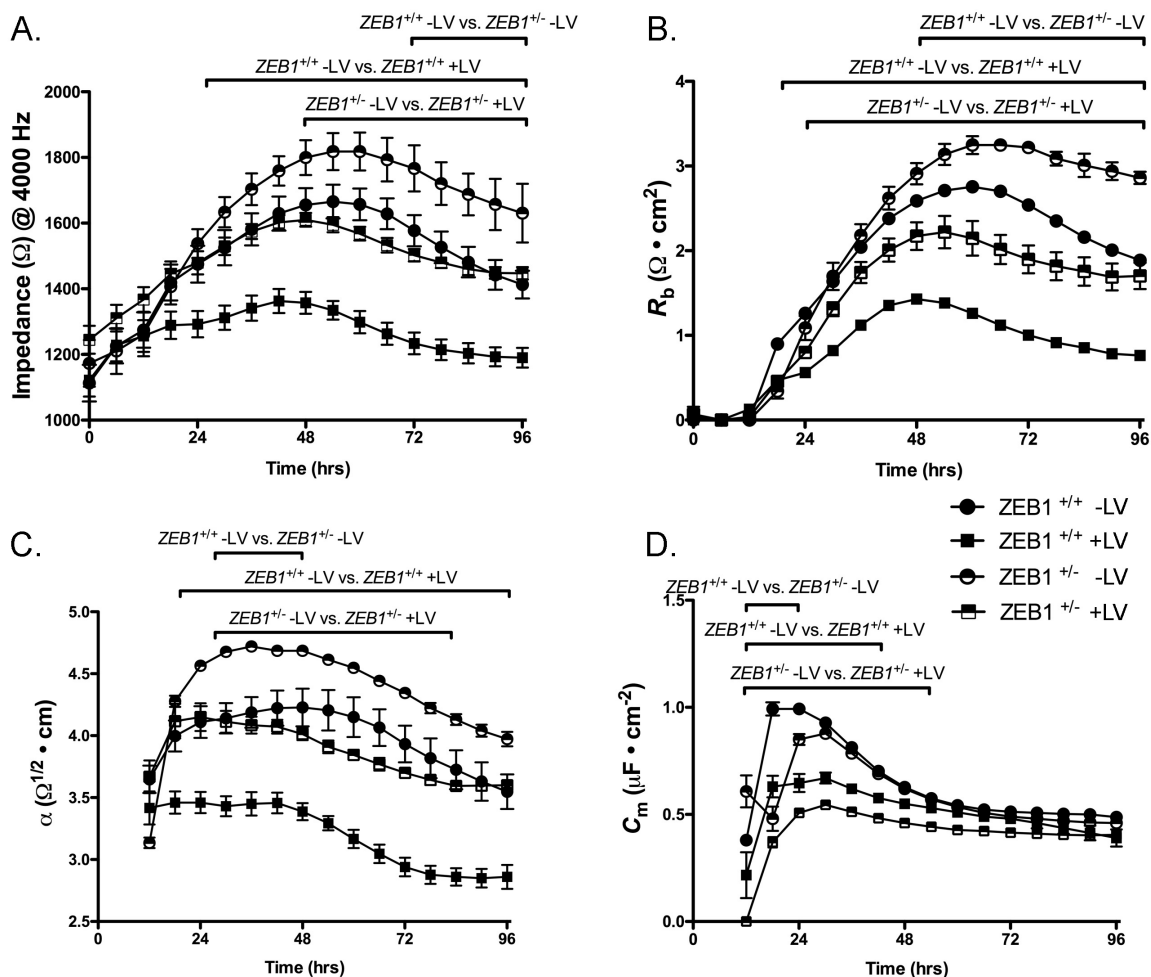

290

291 **Fig 5. ZEB1 modulates cell barrier function in CEnC.** (A) Electrical impedance ( $\Omega$  at 4000 Hz), a  
 292 metric of cell barrier function, was measured for up to 96 hours after cells were seeded. (B) Electrical  
 293 resistance as a result of cell-cell adhesion was modeled from impedance data in (A) and given as  $R_b$  ( $\Omega \cdot$   
 294  $\text{cm}^2$ ). (C) Electrical resistance caused by cell-substrate adhesion was modeled from the impedance data in  
 295 (A) and given as  $\alpha$  ( $\Omega^{1/2} \cdot \text{cm}$ ). (D) Cell membrane capacitance, influenced by membrane complexity and  
 296 morphology, was modeled from the impedance data in (A) and given as  $C_m$  ( $\mu\text{F} \cdot \text{cm}^2$ ). Filled circle: wild  
 297 type CEnC ( $ZEB1^{+/+}$  -LV); half-filled circle:  $ZEB1$  heterozygous CEnC ( $ZEB1^{+/-}$  -LV); filled square:  
 298  $ZEB1^{+/+}$  cells in which ZEB1 levels were augmented using lentivirus, ( $ZEB1^{+/+}$  +LV); half-filled square:  
 299  $ZEB1^{+/-}$  CEnC in which ZEB1 levels were reconstituted using lentivirus ( $ZEB1^{+/-}$  +LV). Data are plotted  
 300 over 96 hours as the mean  $\pm$  SEM (n=3,4). Comparisons were performed using two-way (genotype and  
 301 time) repeated measures ANOVA with post-hoc Bonferroni test. Horizontal bars above curves represent  
 302 time ranges for the indicated comparisons that demonstrated statistical significance,  $P < 0.05$ .

303

304 **ZEB1 insufficiency does not affect lactate transport in CEnC**

## ZEB1 and corneal endothelial cell biology

305 Lactate transport is a characteristic function of corneal endothelium, and the original HCEnC-21T  
306 line retained this function [24]. Lactate is co-transported across the plasma membrane with  
307 protons ( $H^+$ ) by lactate monocarboxylate transporters. To determine the effect that ZEB1 levels  
308 play in regulating lactate transport, we measured intracellular pH ( $pH_i$ ) during various stages of  
309 lactate exposure (Fig 6). *ZEB1<sup>+/+</sup>*-LV cells perfused with lactate buffer demonstrated an influx of  
310  $H^+$  ions as indicated by the reduction of  $pH_i$  (Fig 6A). Subsequent perfusion with lactate-free  
311 buffer resulted in the efflux of  $H^+$  and re-establishment of the resting  $pH_i$ . No significant  
312 difference in lactate transport was observed following reduction of ZEB1 (*ZEB1<sup>+/-</sup>*-LV) or with  
313 the addition of ZEB1 to either the *ZEB1<sup>+/+</sup>* or *ZEB1<sup>+/-</sup>* cells (Fig 6B-D).



## ZEB1 and corneal endothelial cell biology

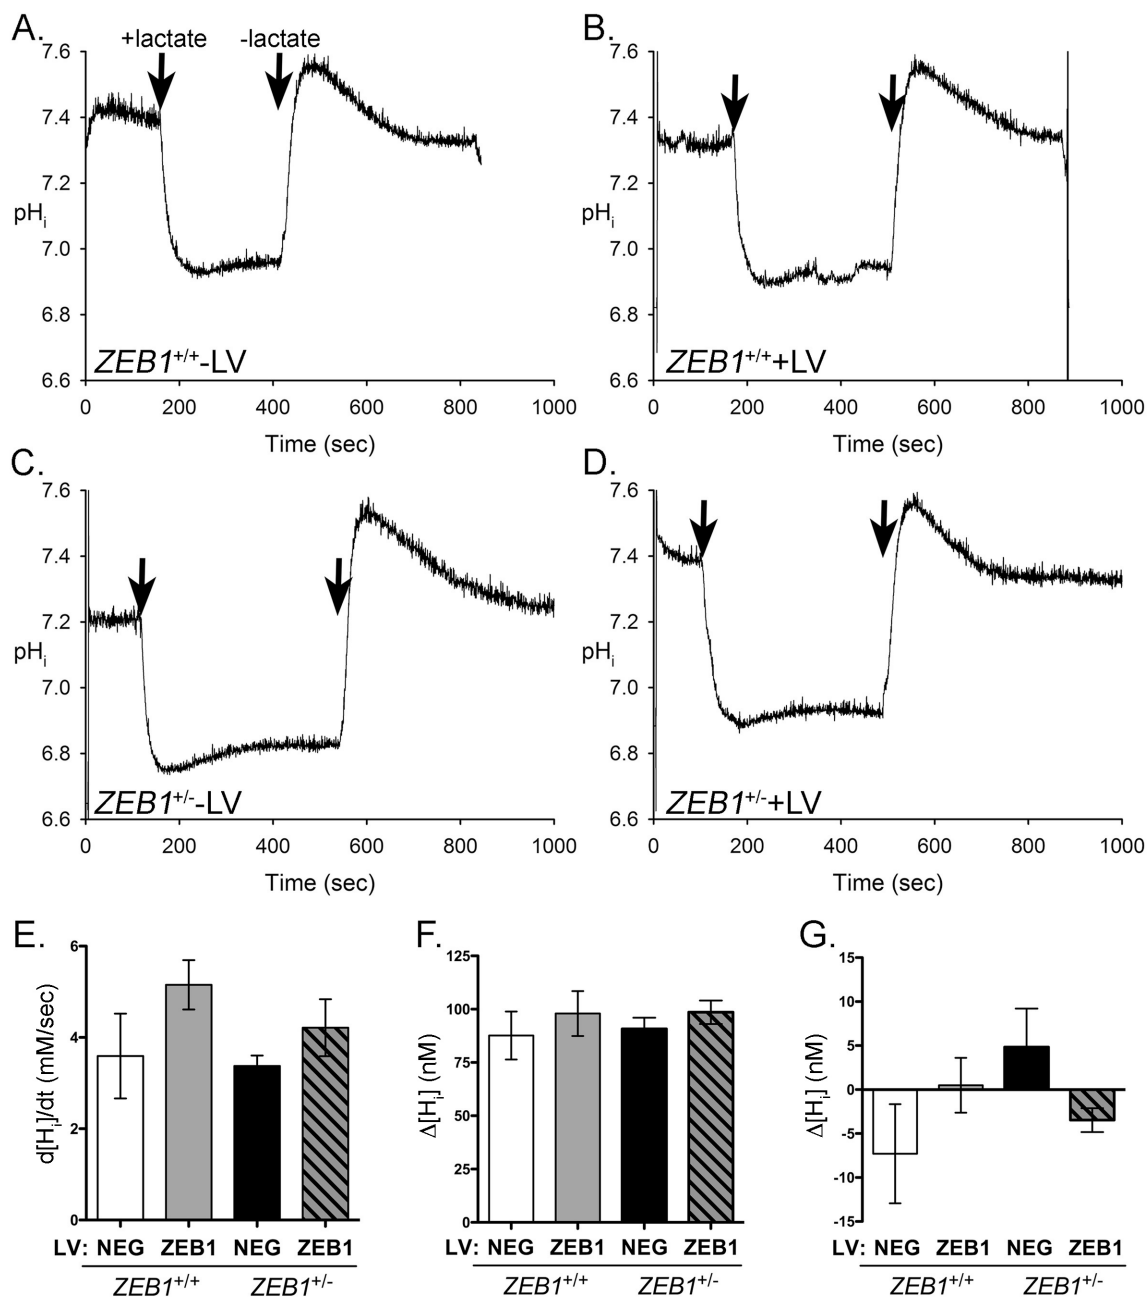

314

315 **Fig 6. ZEB1 insufficiency does not affect the CEnC response to lactate.** (A-D) Traces showing effect of  
 316 lactate exposure on intracellular pH ( $pH_i$ ) in the CEnC lines. Note that lactate is co-transported across the  
 317 membrane with protons.  $pH_i$  was calculated from fluorescence measurements of cells pre-loaded with the  
 318 fluorescent pH indicator BCECF. A resting  $pH_i$  was established before perfusion with lactate (20mM).  
 319 Arrows indicate addition or removal of lactate. (E) Bar graph showing the maximum change in intracellular  
 320 proton concentration ( $[H]_i$ , nM) per second ( $d[H]_i/dt$ ) after addition of lactate. (F) Bar graph showing the  
 321 mean of the difference between resting  $[H]_i$  and minimum  $[H]_i$  achieved after addition of lactate. (G) Bar  
 322 graph representing the mean of the difference between the pre-lactate resting  $[H]_i$  and the post-lactate  
 323 resting  $[H]_i$ . Data in E-G were represented as the mean  $\pm$ SEM ( $n=3$ ). Comparisons in E-G were performed  
 324 using one-way ANOVA with post-hoc Tukey test. No statistically significant differences were identified.  
 325

## ZEB1 and corneal endothelial cell biology

326 To assess the dynamics of lactate transport, the change in proton concentration during  
 327 different phases of lactate perfusion was calculated. After the initial exposure to lactate, a rapid  
 328 influx of H<sup>+</sup> ions occurred, leading to a drop in pH<sub>i</sub> (increase in [H<sub>i</sub>]). The maximum rate of  
 329 change (d[H<sub>i</sub>]/dt) was calculated and graphed (Fig 6E). While the absolute values (bars) for  
 330 d[H<sub>i</sub>]/dt appear to be dependent on ZEB1 levels, the association was not statistically significant.  
 331 We also calculated the difference between resting H<sub>i</sub> concentration, achieved before exposure to  
 332 lactate, and maximum H<sub>i</sub> concentration, achieved after the addition of lactate (Δ[H<sub>i</sub>]; Fig 6F). No  
 333 significant difference was observed in d[H<sub>i</sub>] between *ZEB1*<sup>+/+</sup> or *ZEB1*<sup>+/-</sup> +/- LV cells. The  
 334 difference between the pre-lactate resting H<sub>i</sub> concentration and the post-lactate resting H<sub>i</sub>  
 335 concentration was calculated (Δ[H<sub>i</sub>]; Fig 6G). While marked differences in Δ[H<sub>i</sub>] were observed  
 336 between *ZEB1*<sup>+/+</sup> and *ZEB1*<sup>+/-</sup> +/- LV cells, the differences were not statistically significant.

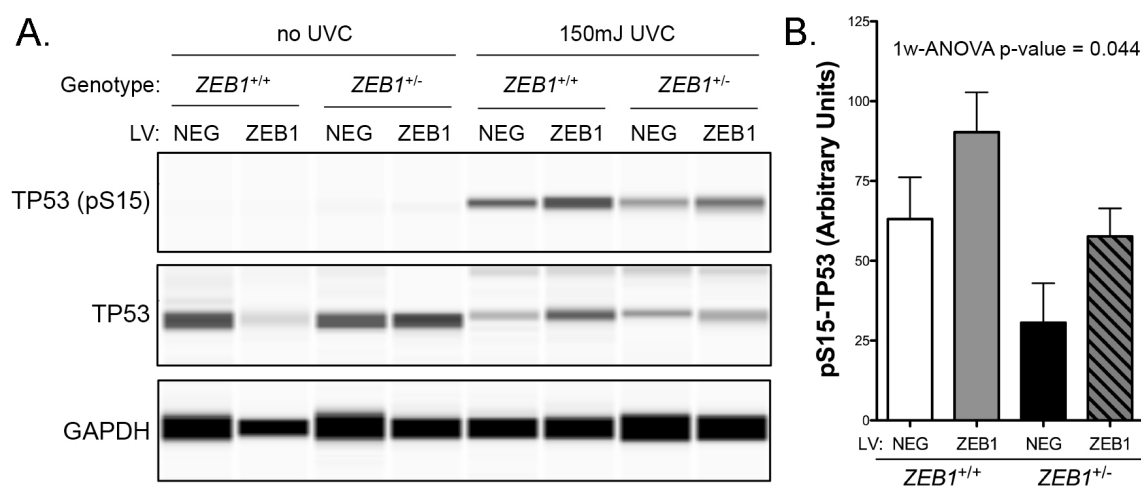

337

338 **Fig 7. ZEB1 reduction may alter the CEnC response to UVC-induced apoptosis.** (A) Western results  
 339 showing levels of TP53 phosphorylated at Serine 15 in whole-cell lysates prepared from the *ZEB1* CEnC  
 340 lines treated either with 0 mJ or 150 mJ of UVC. Representative results from three independent  
 341 experiments are shown. Detection of total TP53 and GAPDH were used as loading controls. (B) Bar graph  
 342 representing abundance of pS15-TP53 normalized for loading. Data are represented as the mean ± SEM  
 343 (n=3). Statistical analysis was performed using one-way ANOVA with post-hoc Tukey test.  
 344

### 345 ZEB1 insufficiency may affect ultraviolet radiation-induced apoptosis in CEnC

346 Corneal endothelial cell density decreases over an individual's lifetime, due in part to cell  
 347 apoptosis. To investigate the effect of reduced ZEB1 on CEnC apoptosis, we exposed *ZEB1*<sup>+/+</sup> +/-

## ZEB1 and corneal endothelial cell biology

348 LV and *ZEB1*<sup>+/-</sup> +/-LV CEnC to ultraviolet C (UVC) for 6 hours and measured phosphorylation  
349 of tumor protein 53 (TP53), which is phosphorylated at Serine 15 during apoptosis (Fig 7) [25]. A  
350 decrease in phosphorylated TP53 was observed in *ZEB1*<sup>+/-</sup> -LV cells compared with *ZEB1*<sup>+/+</sup> -LV  
351 cells (Fig 7A). Correspondingly, augmenting ZEB1 levels in both *ZEB1*<sup>+/-</sup> (*ZEB1*<sup>+/-</sup> +LV) and  
352 *ZEB1*<sup>+/+</sup> (*ZEB1*<sup>+/+</sup> +LV) cells resulted in an increase in phosphorylated TP53 compared with  
353 *ZEB1*<sup>+/-</sup> -LV and *ZEB1*<sup>+/+</sup> -LV cells, respectively. While none of these pairwise comparisons  
354 demonstrated statistical significance, it is important to note that the p-value obtained for the 1-  
355 way ANOVA was significant (p=0.044), suggesting that the observed means for all four groups,  
356 taken together, have a low likelihood of occurring by chance alone (Fig 7B).

## ZEB1 and corneal endothelial cell biology

357

### DISCUSSION

358 Cell state transitions are critical processes during embryonic development, tissue remodeling and  
359 disease [1]. The transcription factor ZEB1 plays a central role in the regulation of the EMT/MET  
360 processes. Changes in ZEB1 expression are sufficient to induce EMT/MET [26], but it is not  
361 necessary since other ZEB1-related transcription factors (e.g., SNAIL1, TWIST, OVOL2,  
362 GRHL2) have also been shown to mediate these processes [27, 28], with some accomplishing this  
363 by directly regulating *ZEB1* transcription [8, 9, 29, 30]. In cancer, the transition from the  
364 epithelial to mesenchymal phenotype involves intermediate transition states, which are  
365 characterized by the expression of both epithelial- and mesenchymal-associated genes [2-7]. In  
366 general, progression towards the mesenchymal state results in a less pronounced epithelial-  
367 associated gene expression profile and increased expression of mesenchymal-associated genes.

368 Contact inhibited and quiescent [31] corneal endothelial cells, when dissociated from the  
369 cornea and grown in culture, have demonstrated re-initiation of the cell cycle and transition  
370 towards a fibroblast-like (i.e., mesenchymal) phenotype [32, 33], which is associated with an  
371 increase in ZEB1 expression [11]. This process is termed endothelial to mesenchymal transition  
372 (EnMT) and can be induced by various growth factors and cytokines [34]. As such, there is  
373 overwhelming evidence that the terminally differentiated and quiescent corneal endothelial cells  
374 retain the potential to undergo a CST towards a fibroblast-like phenotype. Similarly, vascular  
375 endothelium has also been observed to undergo EnMT [35], and this is in addition to an EMT-  
376 like (epithelial to endothelial) transition that may form the basis for vascular mimicry in cancer  
377 [36]. Taken together, these findings raise the possibility that endothelial cells possess the  
378 potential to transition to an epithelial-like state, (i.e., endothelial to epithelial transition, EnET).

379 Evidence for EnET may be found in a disease of the corneal endothelium, posterior  
380 polymorphous corneal dystrophy (PPCD). PPCD was first reported in 1916 as a defect of the  
381 posterior surface of the cornea [37]. Beginning in the early 1970s, a renewed interest in PPCD  
382 culminated in the publication of various comprehensive studies describing clinical [38-42] and

## ZEB1 and corneal endothelial cell biology

383 histopathologic/molecular features of PPCD [41-45]. Together, these reports provided the first  
384 indication that the corneal endothelial cells had gained an epithelial-like phenotype given that the  
385 observed morphologic/ultrastructural features and gene expression changes were consistent with  
386 such a phenotype. The first transcriptomic study characterizing the gene expression changes in  
387 PPCD was reported in 2017, and provided evidence for a widespread increase or ectopic  
388 expression of epithelial-associated genes [17]. The genotypes that have been associated with  
389 PPCD have also proved to be strong evidence for an MET-like transition of an endothelial to an  
390 epithelial phenotype [16]. This is because the genes associated with PPCD have all been reported  
391 to play central roles in either EMT (*ZEB1*) [26] and/or MET (*OVOL2* and *GRHL2*) [8, 9, 29, 30].

392 While the epithelial cell-like features demonstrated by corneal endothelial cells in PPCD  
393 have been well characterized, little is known regarding the functional properties of the aberrant  
394 endothelial cells. Thus, we recently reported functional consequences of ZEB1 insufficiency in  
395 corneal endothelial cells using ZEB1 siRNA [18]. This study was informative, but we recognized  
396 its limitations and subsequently developed another cell-based model of PPCD using CRISPR-  
397 Cas9 gene-editing technology. We now report the functional impact that stable monoallelic  
398 knockout of *ZEB1* has on corneal endothelial cells.

399 As a prerequisite to performing relevant functional studies, we validated our cell-based  
400 model using a transcriptomic approach. Because of the nature of cell culture and immortalization,  
401 we expected to observe differences that were not directly relevant to our disease model.  
402 Nevertheless, as ZEB1 is robust at mediating EMT in disparate cell types, we concluded that the  
403 “background” gene expression was not likely to play a significant role in our study, although this  
404 remains a limitation of our model. We demonstrated that the *ZEB1*<sup>+/-</sup> CEnC possessed a gene  
405 expression profile similar to that observed in PPCD, with many epithelial-associated genes  
406 demonstrating either increased or ectopic expression in both [17]. Concurrently, we showed that  
407 some corneal endothelial associated genes were downregulated in *ZEB1*<sup>+/-</sup> CEnC, similar to that  
408 observed in PPCD. In addition, the observation that reconstitution of the *ZEB1*<sup>+/-</sup> cells with

## ZEB1 and corneal endothelial cell biology

409 exogenous ZEB1 caused them to regain a wild type-like (*ZEB1*<sup>+/+</sup>) gene expression profile was  
410 particularly notable evidence for the potential utility of gene therapy for PPCD. Taken together,  
411 the transcriptomic results indicated that the *ZEB1*<sup>+/-</sup> cells are an adequate model of PPCD.

412 The epithelial and mesenchymal (i.e., fibroblastic) cell states can be identified in 2D  
413 cultures by characteristic cell shapes associated with each cell state [46]. Epithelial morphology is  
414 characterized by a combination of flat, polygonal and cobblestone-like cells, while fibroblast  
415 morphology is characterized by a combination of stellate, bipolar and elongated cell shapes. We  
416 utilized these differences in the epithelial/fibroblast cell morphology to determine the effects of  
417 altered ZEB1 expression on the CEnC state. The observation that a reduction of ZEB1 in CEnC  
418 leads to a more robust epithelial morphology provides an in vitro correlate for the in vivo  
419 observation that ZEB1 haploinsufficiency leads to an epithelial-like phenotype in PPCD. A  
420 logical follow up would be to investigate the potential of *ZEB1*<sup>+/-</sup> cells to stratify in a 3D culture  
421 system, since a stratified organization is also a characteristic feature of the corneal endothelium in  
422 PPCD.

423 Cell migration and cell division are regulated by complex systems involving both  
424 mechanical and molecular factors [47]. Nevertheless, robust cell adhesion alone (cell-cell and  
425 cell-substrate) explains in large part the reduced migration and cell division observed in epithelial  
426 cells, in contrast to fibroblastic cells [19, 48, 49]. As such, cell migration and cell proliferation  
427 must first invest a large amount of energy in weakening or breaking cell-cell and/or cell-substrate  
428 interactions. In contrast, fibroblastic cells, with notably weaker cell adhesions, possess a higher  
429 capacity for migration and cell division. Consistent with these features, *ZEB1*<sup>+/-</sup> migrated and  
430 proliferated less than *ZEB1*<sup>+/+</sup> cells. While the *ZEB1*<sup>+/-</sup> cells are not characterized by a fibroblastic  
431 phenotype, we postulate that endothelial cells reside in a state between epithelial and  
432 mesenchymal (fibroblastic), which is consistent with its hybrid, epithelial/mesenchymal gene  
433 expression profile.

## ZEB1 and corneal endothelial cell biology

434           The corneal endothelial cell layer is a semipermeable membrane that actively transports  
435 substrates in a unidirectional (stroma to aqueous) manner [50, 51]. The endothelium transports  
436 water from the corneal stroma to the anterior chamber, thereby maintaining a relatively  
437 dehydrated state to achieve/maintain corneal clarity. Because severe cases of PPCD are  
438 characterized by endothelial decompensation and edema [12, 52], the net transport function of the  
439 endothelium must therefore be impaired. The impairment can occur as a consequence of changes  
440 in the expression/targeting/function of membrane solute transporters and/or the physical barrier  
441 established by a combination of increased cell-cell, cell-substrate adhesion or stratification of the  
442 diseased PPCD epithelial-like cells. In the case of the former, we examined lactate transport,  
443 which is a key functional property of the endothelium [53]. We found no significant impact on  
444 lactate transport in *ZEB1*<sup>+/-</sup> cells. While this indicates that ZEB1 insufficiency does not negatively  
445 impact lactate transporter function, other transporters may be affected, which warrants further  
446 study. An impact on cell adhesion may also have an impact on solute transport as it may establish  
447 a significant physical barrier to solute transport. To this end, we observed a significant change in  
448 barrier function established by cell-cell and cell-substrate adhesion, with *ZEB1*<sup>+/-</sup> cells  
449 demonstrating significantly greater cell adhesion compared with *ZEB1*<sup>+/+</sup> cells. This result is  
450 consistent with previous reports demonstrating a role for ZEB1 in cellular adhesion [21-23].  
451 Another potential cause of impaired transport function is the establishment of a stratified  
452 organization of the epithelial-like cells in PPCD, which would provide an additional physical  
453 barrier to the flow of solutes across the corneal endothelium.

454           Significant cell loss is observed in some PPCD cases, suggesting a potential role for cell  
455 death in these cases [12, 52]. In ZEB1 knockdown experiments using siRNA, we demonstrated  
456 that reduction of ZEB1 led to an increased sensitivity to UV-induced apoptosis, but not to  
457 doxorubicin-induced apoptosis [18]. Herein, in a stable ZEB1 knockdown model, we demonstrate  
458 no statistically significant impact of ZEB1 deficiency (or ZEB1 augmentation/rescue) on  
459 apoptosis when a pairwise statistical analysis is performed. However, statistical analysis of the

## ZEB1 and corneal endothelial cell biology

460 collection of means did demonstrate statistical significance. In addition, the positive correlation of  
461 ZEB1 with the observed means (i.e., decreased ZEB1 associated with decreased apoptosis and  
462 increased ZEB1 associated with increased apoptosis) suggest that ZEB1 may play a role in UVC-  
463 induced apoptosis. .

464 In summary, PPCD is characterized by a CST that is consistent with the EMT/MET  
465 pathways. This change is marked by gene expression changes consistent with an MET-like  
466 transition, and is characterized by the reduction in *CDH2* and an increase in *CDH1* expression,  
467 the so-called cadherin switch, a classic feature of EMT/MET. Clinical, histopathologic, genetic  
468 and molecular features of PPCD endothelium strongly support a model of disease consistent with  
469 a MET-like process (Fig 8). In addition, a majority of the cellular processes investigated in  
470 *ZEB1*<sup>+/-</sup> cells demonstrated results consistent with an epithelial-like phenotype compared with  
471 mesenchymal/fibroblastic phenotype. Notably, reconstitution of *ZEB1*<sup>+/-</sup> cells with exogenous  
472 ZEB1 showed the potential clinical utility of *ZEB1* gene therapy with the rescue of the observed  
473 epithelial-associated functional phenotypes. Therefore, we propose EnET as a distinct MET-like  
474 process important in corneal endothelial biology, with ZEB1 as a key regulator of this transition.



## ZEB1 and corneal endothelial cell biology

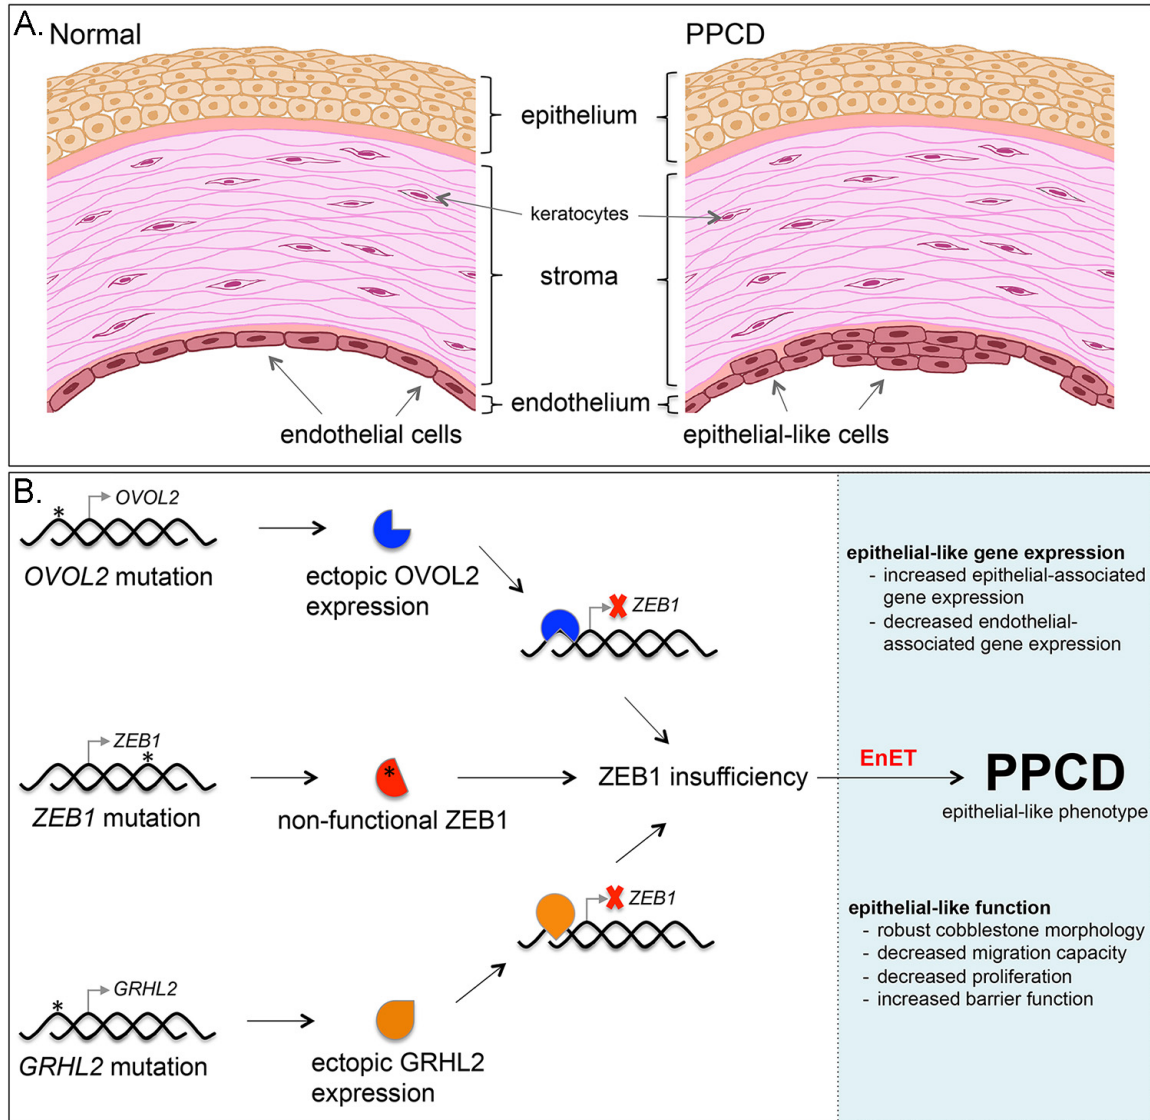

475

476 **Fig 8. Model for the role of ZEB1 in PPCD characterized by EnET.** (A) Illustration of the cornea  
 477 depicts the three main cellular layers, the anterior stratified organization of the epithelial cells comprising  
 478 the epithelium, the collagen-rich stroma containing dispersed keratocytes, and the posterior corneal  
 479 endothelium, which is characterized by a monolayer of corneal endothelial cells. In PPCD, the corneal  
 480 endothelium is characterized by foci of epithelial-like cells present in a stratified organization,  
 481 characteristic of the corneal epithelium. (B) Schematic of the genotype-to-phenotype model of PPCD.  
 482 Truncating mutations (\*) in *ZEB1* were the first mutations associated with PPCD. The non-functional  
 483 mutant protein (red symbol with asterisk) leads to *ZEB1* insufficiency and endothelial to epithelial  
 484 transition (EnET), which forms the basis for the characteristic clinical and histopathologic features of  
 485 PPCD. Mutations in the promoter region of *OVOL2* or *GRHL2* release intrinsic repression of these genes  
 486 and lead to ectopic production of their respective transcription factors in the corneal endothelium. *OVOL2*  
 487 (blue symbol) and *GRHL2* (orange symbol) are known to directly repress *ZEB1* gene transcription (red X)  
 488 by binding to the *ZEB1* promoter. Consequently, *ZEB1* transcription is reduced, leading to *ZEB1*  
 489 insufficiency and EnET.

490

## ZEB1 and corneal endothelial cell biology

491

### MATERIALS AND METHODS

492 Corneal specimens from individuals with posterior polymorphous corneal dystrophy were  
493 obtained under a University of California at Los Angeles Institutional Review Board approved  
494 protocol (UCLA IRB no. 11-000020). Informed written consent was obtained from all human  
495 subjects according to the tenets of the Declaration of Helsinki.

496

#### 497 **Cell culture**

498 All CEnC lines in this study were generated from HCEnc-21T cells, an immortalized human  
499 corneal endothelial cell line. Cells were maintained and cultured using cell culture-grade plastic  
500 flasks coated for 2 hours with a mixture consisting of 40  $\mu\text{g}/\text{cm}^2$  chondroitin sulfate (Sigma-  
501 Aldrich), 40  $\text{ng}/\text{cm}^2$  laminin (L4544; Sigma-Aldrich), and Dulbecco's PBS. The cells were  
502 grown in a 1:1 mixture of F12-Ham's medium and M199 medium, supplemented with 5% fetal  
503 bovine serum (Atlanta Biologicals), 20  $\mu\text{g}/\text{mL}$  human recombinant insulin (Thermo Fisher  
504 Scientific), 20  $\mu\text{g}/\text{mL}$  ascorbic acid (Sigma-Aldrich), 10  $\text{ng}/\text{mL}$  recombinant human fibroblast  
505 growth factor (basic), 100  $\mu\text{g}/\text{mL}$  penicillin (Thermo Fisher Scientific), and 100  $\mu\text{g}/\text{mL}$   
506 streptomycin (Thermo Fisher Scientific). HEK293T cells were grown in DMEM supplemented  
507 with 10% fetal bovine serum, 100  $\mu\text{g}/\text{mL}$  penicillin and  $\mu\text{g}/\text{mL}$  streptomycin. The cell lines were  
508 maintained in a humidified chamber containing 5%  $\text{CO}_2$ .

509

#### 510 **Cell line authentication**

511 The HCEnc-21T cell line was produced from primary human corneal endothelial cells (sourced  
512 from cadaveric corneas) using telomerase immortalization [24]. The authors showed that the cells  
513 retained gene expression and functional characteristics of corneal endothelial cells. In addition,  
514 after we obtained the cells (a gift from Dr. Ula Jurkunas), we characterized them using a  
515 transcriptomics approach and identified the expression of a number of genes distinct for ex vivo  
516 human corneal endothelial cells [11]. In this same study, we identified high expression of the

## ZEB1 and corneal endothelial cell biology

517 human telomerase reverse transcriptase gene, confirming the method used to immortalize the  
518 cells. We also performed short tandem repeat (STR) analysis for the *ZEB1*<sup>+/+</sup> and *ZEB1*<sup>+/-</sup> cell  
519 lines. Genomic DNA was isolated from the cell lines using the FlexiGene DNA Kit (Qiagen).  
520 Subsequently, authentication was performed using the PowerPlex 16 System (Promega), a  
521 multiplex STR system that complies with ANSI/ATCC ASN-0002-2011 guidelines for cell line  
522 authentication. The STR profiles generated for the cell lines were a perfect match to the STR  
523 profile of the parental cell line [18].

524

### 525 **Generation of *ZEB1*<sup>+/-</sup> cell line using CRISPR-Cas9**

#### 526 *In Silico guide RNA (gRNA) Design*

527 We designed our gRNA (Sigma Aldrich) to target the Cas9 nuclease to exon 4 of *ZEB1* to ensure  
528 that the encoded mutant proteins were dysfunctional and that all known splice variants would be  
529 affected (S2A Fig.). The design was performed using the crispr.MIT.edu design tool that  
530 identifies optimal target sequences with a minimum of potential off-target sites using the hg19  
531 genome build (S2B and S2C Figs).

532

#### 533 *Transfection of HCEnc-21T Cells*

534 The selected gRNA was hybridized to a complementary strand, and was subsequently ligated into  
535 pSpCas9(BB)-2A-Puro (PX459) plasmid, a gift from Dr. Feng Zhang (Addgene plasmid #62988)  
536 [54] (S2D Fig.). Successfully transfected cells were selected and identified using media  
537 containing puromycin. Transfection of the cells was verified by performing Western blots to  
538 confirm the presence of the Cas9 protein (S2E Fig.).

539

#### 540 *Clonal Expansion and Characterization*

541 Limiting dilutions were performed to isolate single cells in 96-well plates. Viable cells identified  
542 by microscopy were allowed to grow to confluence and were passaged and transferred to 24-well

## ZEB1 and corneal endothelial cell biology

543 plates. Mutants and controls clones were identified by Sanger sequencing and were transferred to  
544 12-well plates. Genomic DNA was isolated from the clones using QuickExtract (Qiagen) and  
545 *ZEB1* was screened in each clone using Sanger sequencing (Laragen). CRISP-ID was used to  
546 predict the sequences for each of the two alleles from the Sanger sequencing data that was  
547 generated using diploid gDNA template (S3A Fig.) [55]. ZEB1 protein levels were measured  
548 using an anti-ZEB1 rabbit monoclonal antibody (AB\_1904164) diluted to 1:500 in 0.1% non-fat  
549 dried milk in Tris buffered saline solution containing Tween 20.

550

### 551 *Allele-specific sequencing*

552 Amplicons generated from exon 4 from selected clones were subcloned into plasmid vectors  
553 using a TA-cloning kit (Thermo Fisher Scientific)(S3 Fig.). Plasmids containing one of two exon  
554 4 alleles were isolated and screening of the cloned insert was performed using Sanger sequencing  
555 (Laragen). The allele-specific sequencing method provided an unambiguous means for  
556 identifying indels in each respective allele after CRISPR-Cas9 gene editing. Clones were further  
557 characterized by Western blot to detect ZEB1 protein levels and phase-contrast microscopy to  
558 assess cell morphology (S3B and S3C Figs). Clones 11 (*ZEB1<sup>+/+</sup>*) and 12 (*ZEB1<sup>+/-</sup>*) were selected  
559 to establish cell lines representative of each genotype that was used in this study (S4 Fig.).

560

### 561 *Screening of off-target sites*

562 As off-target editing by the CRISPR-Cas9 technique may alter cell function in unpredictable  
563 ways, identification and screening of potential off-target sites was performed. Primers were  
564 purchased from Integrated DNA Technologies and designed to screen each of the top 10 off-  
565 target sites predicted by the crispr.MIT.edu tool (S1 Table). Sequencing of each site was  
566 performed using Sanger sequencing (S5 Fig.).

567

### 568 **ZEB1 lentivirus production**

## ZEB1 and corneal endothelial cell biology

569 HEK-293T cells were transfected with a transfer plasmid (pReceiver-Lv215) containing *ZEB1*  
570 cDNA of transcript variant 2 (NM\_030751.5) (GeneCopoeia) and a 3<sup>rd</sup>-generation packaging  
571 system. Cell transfection was performed using LTX transfection reagent with Plus Reagent  
572 (Thermo Fisher Scientific) in antibiotic-free medium. Viral supernatants were collected and large  
573 particulates were pelleted by centrifugation at 3000 RPM in a swinging bucket rotor (Beckman  
574 Coulter). Cleared supernatants were filtered through a 0.45  $\mu$ m syringe filter (Fisher Scientific)  
575 and the viral particles were concentrated in an Optima LE8-80K ultracentrifuge (Beckman  
576 Coulter) at 25,000 RPM for 90 min at 4°C using the SW28 rotor. Pelleted viral particles were  
577 resuspended in 25  $\mu$ L DPBS for every 10 mL of viral supernatant. Total viral particles were  
578 determined by p24 ELISA, performed by the UCLA Integrated Molecular Technologies Core,  
579 and the infection units were determined by transduction of HCEnc-21T cells with diluted virus.  
580 Subsequently, transduction of the CEnC lines was performed at a multiplicity of infection (MOI)  
581 value of 10. Infection was facilitated with the addition of 8  $\mu$ g/mL of hexadimethrine bromide  
582 (Sigma-Aldrich).

583

### 584 **Generation of *ZEB1* transgenic *ZEB1*<sup>+/+</sup> and *ZEB1*<sup>+/-</sup> cell lines**

585 While rescue of the *ZEB1* insufficiency phenotype was observed for cell proliferation and cell  
586 barrier function using transient *ZEB1* expression, assay for other cellular functional processes did  
587 not demonstrate rescue of the *ZEB1*<sup>+/-</sup> phenotype following transient reconstitution with *ZEB1*.  
588 To account for the possibility that only a prolonged/constitutive reconstituted expression of *ZEB1*  
589 was capable of inducing rescue, we generated *ZEB1* transgenic cell lines harboring either the  
590 *ZEB1*<sup>+/+</sup> or *ZEB1*<sup>+/-</sup> genotype. CEnC were transduced with either empty or *ZEB1* lentivirus. Five  
591 days after transduction, cell clones were isolated and expanded using the limited dilution method  
592 by seeding 0.5 cells/well of a 96-well plate. Several clones were expanded for each CEnC group  
593 (*ZEB1*<sup>+/+</sup> -LV, *ZEB1*<sup>+/+</sup> +LV, *ZEB1*<sup>+/-</sup> -LV and *ZEB1*<sup>+/-</sup> +LV), and were subsequently  
594 characterized by cell morphology and *ZEB1* Western blot (rabbit monoclonal anti-*ZEB1* antibody,

## ZEB1 and corneal endothelial cell biology

595 AB\_1904164). Three clones per cell group were chosen as independent biological lines (12  
596 clones total, 3 per CEnC group). Assays to assess cell migration, cell morphology and lactate  
597 transport function were performed with each of the respective clones representing a single  
598 independent sample (n=1), so that three independent clones (n=3) were used for statistical  
599 analysis. In addition, these 12 clones were used for RNA-seq and qPCR analysis.

600

### 601 **RNA-sequencing and transcriptomic analysis**

602 RNA was isolated from the *ZEB1* CEnC lines and RNA-seq libraries were prepared using the  
603 KAPA mRNA HyperPrep Kit using an automated liquid handler (Janus G3 – PerkinElmer)  
604 according to manufacturer's instructions at the UCLA Institute for Quantitative and  
605 Computational Biology. Libraries were sequenced on the Illumina HiSeq 4000 platform by the  
606 UCLA Broad Stem Cell Research Center High-Throughput Sequencing Core Resource. All  
607 RNA-seq data contains single-end 50 base pair reads, which were aligned (grch38.p12) and  
608 transcripts quantified (homo sapiens Ensembl Annotation Release 92) using the kallisto (v0.44.0)  
609 program [56]. Quantities were given in transcripts per million (TPM). Differential gene  
610 expression analysis was performed with the Sleuth (v0.30.0) R-package [57]. Differential  
611 expression was tested using a likelihood ratio test, and corrected for multiple testing using the  
612 Benjamini-Hochberg correction. The following thresholds defined differential expression: fold  
613 change (fc) > 2, TPM > 15 and p-value < 0.5 (PPCD data); fc > 1.5, TPM > 0.6 and p-value < 0.2 (*ZEB1*  
614 CEnC lines). Because the PPCD data was generated from two samples, we used a p-value of 0.5  
615 to reduce false-positives. Given the relatively high variation between the cell lines within each  
616 group, a p-value of 0.2 was used for DGE. While this may have increased the number of false-  
617 positives, the use of this p-value allowed genes known to be involved in EMT or regulated by  
618 *ZEB1* to be considered differentially expressed. We generated heatmaps using the *pheatmap*  
619 function within the *pheatmap* (v1.0.10) R-package. RNA-seq data were obtained from the GEO  
620 DataSets database (PPCD endothelium, accession number GSE90489; ex vivo endothelium and

## ZEB1 and corneal endothelial cell biology

621 epithelium, accession GSE121922). RNA-seq data for the cell lines were submitted to GEO  
622 DataSets and assigned accession number GSE121680.

623         Distribution of differentially expressed genes in PPCD endothelium versus evCEnC and  
624 evCEpC was statistically analyzed using two methods, a bootstrap approach and the  
625 hypergeometric statistical test. The hypergeometric test (hgt) was performed as previously  
626 described [58, 59] and was computed in R using the *dhypcr* function with significance defined as  
627  $p < 0.05$ . For the bootstrap method, we combined the Law of Large Numbers and the Central Limit  
628 Theorem to create normal sampling distributions centered on the population mean for each of the  
629 combinations of gene pools that were examined. We wrote a simulation in R  
630 (<https://zenodo.org/badge/latestdoi/154679145>) and performed 10,000 iterations to create a  
631 sampling distribution of the possible outcomes. The number of genes observed by experiment  
632 was compared to the sampling distribution to find the probability (p-value) that the number  
633 observed by experiment could have occurred by chance. Significance was defined by  $0.95 > p <$   
634  $0.05$ .

635

### 636 **Immunohistochemistry**

637 Full-thickness PPCD cornea obtained at the time of surgery and cadaveric donor cornea obtained  
638 from an eye bank were fixed in 10% Formalin and embedded in paraffin. Tissue was sectioned at  
639 a thickness of 5  $\mu\text{m}$  and affixed to a frosted glass slide. Sections were deparaffinized in xylene  
640 and rehydrated in an alcohol series. Antigen retrieval was performed with Proteinase K digestion,  
641 and tissue was subsequently blocked in 5% goat serum and 1% bovine serum albumin. CLDN1  
642 was detected using a rabbit monoclonal antibody (D5H1D; CST13255), and ADCYAP1R1 was  
643 detected using a rabbit polyclonal antibody (AB\_777009). Antibodies were diluted 1:1000 in  
644 blocking buffer. Detection was performed using an anti-rabbit Alexa fluor conjugated secondary  
645 antibody and visualized using a confocal fluorescence microscope.

646

## ZEB1 and corneal endothelial cell biology

### 647 **Quantitative polymerase chain reaction**

648 Quantitative polymerase chain reaction (qPCR) was performed to validate the level of *ZEB1* gene  
649 expression in the *ZEB1* CEnC lines. First-strand synthesis was performed with the SuperScript III  
650 First-Strand Synthesis kit (Thermo Fisher Scientific) using oligo-dT primers and 100ng of total  
651 RNA. Quantitative PCRs were performed on the LightCycler 480 System (Roche) using the  
652 KAPA SYBR FAST qPCR Kit (KAPA Biosystems) and *ZEB1*-specific oligonucleotide primers  
653 (Forward, 5'-TTACACCTTTGCATACAGAACCC-3'; Reverse, 5'-  
654 TTTACGATTACACCCAGACTGC-3'; ID: 291575187c2) obtained from the Harvard Primer  
655 Bank database [60-62]. Relative gene expression was obtained by comparison to the  
656 housekeeping gene *RAB7* and was calculated by the comparative Ct ( $2^{-\Delta C_t}$ ) method [63].  
657 Transcript quantities were graphed as  $2^{-\Delta C_t}$ .

658

### 659 **Cell morphology analysis using phase contrast microscopy**

660 Images of *ZEB1* transgenic *ZEB1*<sup>+/+</sup> and *ZEB1*<sup>+/-</sup> cell cultures at day 1 (sub-confluent) and at day  
661 3 post-seeding (confluent) were acquired using the Leica DMIL LED inverted microscope (Leica  
662 Microsystems) and the N PLAN L 20x/0.35 PH1 objective. Image capture was performed with  
663 the Leica DFC3000 G monochrome camera controlled with the Leica Application Suite X  
664 software (version 3.0.3.16319). Image analysis was performed using ImageJ 1.51h (National  
665 Institutes of Health). Regions of interest (ROI) were created along the major axis of cells using  
666 the straight-line tool and collected in the ROI manager. After creating an ROI along the major  
667 axis of all cells (excluding those cells along the edge of the image) the ROI length in microns was  
668 obtained. A total of three fields, each with hundreds of cells for each cell group (*ZEB1*<sup>+/+</sup> -LV,  
669 *ZEB1*<sup>+/+</sup> +LV, *ZEB1*<sup>+/-</sup> -LV and *ZEB1*<sup>+/-</sup> +LV), were assessed.

670

### 671 **Non-wounding cell migration assay**



## ZEB1 and corneal endothelial cell biology

672 Cell migration was assessed using a non-wounding method. Two-well silicone inserts (ibidi  
673 GmbH), each creating a 500um gap, were placed onto cell culture treated plastic. Cells were  
674 seeded into each well and allowed to grow to confluence. When cells reached confluence, cell  
675 migration was initiated by removal of the silicone inserts. Progression of cell migration was  
676 monitored for 24 hours by phase-contrast microscopy using the BZ-X800 microscopy system  
677 (Keyence Corporation of America). Image analysis was performed using ImageJ 1.51h software  
678 (National Institutes of Health).

679

### 680 **Cell counting proliferation assay**

681 CEnC proliferation was measured for *ZEB1*<sup>+/+</sup> and *ZEB1*<sup>+/-</sup> cell lines transduced with ZEB1  
682 lentivirus or an empty lentivirus, which was used as a negative control. Lentivirus (10 MOI) was  
683 applied to *ZEB1*<sup>+/+</sup> and *ZEB1*<sup>+/-</sup> cell lines and incubated for 5 days, at which point the cells were  
684 trypsinized with 0.25% trypsin, counted using a hemacytometer and seeded at 10% confluence on  
685 laminin coated plastic. The remaining cells were either used for barrier function analysis or lysed  
686 and prepared for Western blotting, which was used to confirm ZEB1 protein levels in each of the  
687 four groups. The newly seeded cultures were incubated for 3, 48, 72 and 96 hours. Cells were  
688 collected by trypsinization, counted and graphed as a ratio ( $N_t/N_0$ , where  $N_0$  equals the number of  
689 cells counted at 3 hours and  $N_t$  equals the number of cells counted at 48, 72 or 96 hours).

690

### 691 **Electric cell-substrate impedance sensing (ECIS) to measure barrier function**

692 A disposable electrode array slide (8W10E+ ECIS, Applied BioPhysics) was stabilized with F99  
693 medium as per manufacturer's protocol. The array surface was coated with 40  $\mu\text{g}/\text{cm}^2$  chondroitin  
694 sulfate A (Sigma-Aldrich) and 400  $\text{ng}/\text{cm}^2$  laminin (Sigma-Aldrich) in phosphate-buffered saline  
695 (PBS) for two hours. Five days after transduction with lentivirus (10 MOI) the cells were  
696 reseeded at 100% confluence within respective chambers of the slide array. Cells were incubated  
697 in the arrays at room temperature for one hour to facilitate even distribution of cell attachment.

## ZEB1 and corneal endothelial cell biology

698 After seeding and preliminary cell attachment, arrays were positioned into a 16-well array station  
699 and connected to the ECIS Z0 instrument to measure electric impedance ( $\Omega$  at 4000 Hz) for 4  
700 days. Cell-cell ( $R_b$ ,  $\Omega \cdot \text{cm}^2$ ) and cell-substrate ( $\alpha$ ,  $\Omega^{1/2} \cdot \text{cm}$ ) adhesion along with cell membrane  
701 capacitance ( $C_m$ ,  $\mu\text{F} \cdot \text{cm}^{-2}$ ) were modeled from the electric impedance data obtained at 4000 Hz  
702 [64].

703

### 704 **CEnC lactate transport function assay**

705 Lactate transport was measured by monitoring free  $\text{H}^+$  concentration (pHi) with a microscope  
706 fluorometer [65] using the fluorescence-based (dual-excitation 500 nm and 440 nm) ratiometric  
707 pH indicator BCECF (Thermo Fisher Scientific), which was pre-loaded into the cells prior to  
708 lactate exposure. BCECF loading was performed in lactate-free solution (20mM Na gluconate,  
709 120mM NaCl, 1mM  $\text{CaCl}_2$ , 1mM  $\text{MgCl}_2$ , 2.5mM  $\text{K}_2\text{HPO}_4$ , 5mM dextrose and 5mM HEPES, pH  
710 7.4), and fluorescence was monitored until a stable pHi was maintained. Subsequently, the  
711 lactate-free buffer was replaced by perfusion with lactate-containing solution (20mM Na lactate  
712 in place of 20mM Na gluconate) for about 200 seconds and then switched back to the lactate-  
713 free solution.

714

### 715 **UVC-induced CEnC apoptosis assay**

716 The CEnC lines were seeded and allowed to reach confluence prior to irradiation with UVC. The  
717 cells were irradiated with  $150 \text{ mJ m}^{-2}$  of UVC radiation using a Stratagene Stratalinker 1800.  
718 Cells were lysed 6 hours post-UVC irradiation. Whole-cell lysates were prepared and processed  
719 for protein detection using the Wes separation 12-230 kDa capillary cartridges (Protein Simple).  
720 Separation and detection were performed as per the manufacturer's instructions. Quantification  
721 and data analysis were performed using the Compass for SW software (version 3.1.7; build ID:  
722 1205). The phosphorylation of TP53 at Serine 15 was used as measure of apoptosis progression  
723 [25]. Total TP53 levels were detected with a rabbit monoclonal antibody (AB\_10695803),

## ZEB1 and corneal endothelial cell biology

724 phosphorylation at Serine 15 of TP53 was detected with a mouse monoclonal antibody

725 (AB\_331741), and total TUBA was detected using a mouse monoclonal antibody (AB\_1904178).

726 Antibodies were diluted to 1:500 in manufacturer's blocking buffer.

727

ZEB1 and corneal endothelial cell biology

728

**ACKNOWLEDGEMENTS**

729 Support provided by National Eye Institute Grants 1R01 EY022082 (A.J.A.), P30  
730 EY000331 (core grant), the Walton Li Chair in Cornea and Uveitis (A.J.A.), the Stotter  
731 Revocable Trust (SEI Cornea Division), an unrestricted grant from Research to Prevent Blindness  
732 (A.J.A.), National Institute of Diabetes and Digestive and Kidney Diseases 1R01 DK077162  
733 (I.K.), the Allan Smidt Charitable Fund (I.K.), Ralph Block Family Foundation (I.K.), and U.S.  
734 Department of Energy Office of Science, Office of Biological and Environmental Research  
735 Program DE-FC02-02ER63421 (M.M).

736

737 The authors declare no competing financial interests.

738

## ZEB1 and corneal endothelial cell biology

739

### **AUTHOR CONTRIBUTIONS**

740 Ricardo F. Frausto and Anthony J. Aldave conceptualized study.

741 Ricardo F. Frausto, Doug D. Chung and Ira Kurtz designed experiments.

742 Ricardo F. Frausto, Doug D. Chung, Payton M. Boere, Vinay S. Swamy, Huong N.V. Duong,

743 Liyo Kao, Rustam Azimov, Wenlin Zhang, E. Maryam Hanser and Austin Kassels performed  
744 experiments.

745 Ricardo F. Frausto, Doug D. Chung, Vinay S. Swamy and Liyo Kao performed data analysis.

746 Ricardo F. Frausto, Vinay S. Swamy, Liam Carrigan and Davey Wong performed statistical  
747 analyses.

748 Marco Morselli prepared RNA-sequencing libraries.

749 Ricardo F. Frausto and Marina Zakharevich generated the knockout and transgenic cell lines.

750 Marina Zakharevich prepared artwork in Figure 8.

751 Ira Kurtz, Matteo Pellegrini and Anthony J. Aldave supervised study.

752 Ricardo F. Frausto and Anthony J. Aldave wrote original draft of manuscript.

753 Anthony J. Aldave acquired funding for study.

754 All authors reviewed and approved the final manuscript.

755

## ZEB1 and corneal endothelial cell biology

756

### REFERENCES

- 757 1. Varga J, Greten FR. Cell plasticity in epithelial homeostasis and tumorigenesis. *Nat Cell*  
758 *Biol.* 2017;19(10):1133-41.
- 759 2. Huang RY, Wong MK, Tan TZ, Kuay KT, Ng AH, Chung VY, et al. An EMT spectrum  
760 defines an anoikis-resistant and spheroidogenic intermediate mesenchymal state that is  
761 sensitive to e-cadherin restoration by a src-kinase inhibitor, saracatinib (AZD0530). *Cell*  
762 *Death Dis.* 2013;4:e915.
- 763 3. Zhang J, Tian XJ, Zhang H, Teng Y, Li R, Bai F, et al. TGF-beta-induced epithelial-to-  
764 mesenchymal transition proceeds through stepwise activation of multiple feedback loops.  
765 *Sci Signal.* 2014;7(345):ra91.
- 766 4. Jolly MK, Tripathi SC, Jia D, Mooney SM, Celiktas M, Hanash SM, et al. Stability of the  
767 hybrid epithelial/mesenchymal phenotype. *Oncotarget.* 2016;7(19):27067-84.
- 768 5. Bieri B, Pierce SE, Kroeger C, Stover DG, Pattabiraman DR, Thiru P, et al. Integrin-beta4  
769 identifies cancer stem cell-enriched populations of partially mesenchymal carcinoma cells.  
770 *Proc Natl Acad Sci U S A.* 2017;114(12):E2337-E46.
- 771 6. Hong T, Watanabe K, Ta CH, Villarreal-Ponce A, Nie Q, Dai X. An *Ovol2-Zeb1* Mutual  
772 Inhibitory Circuit Governs Bidirectional and Multi-step Transition between Epithelial and  
773 Mesenchymal States. *PLoS Comput Biol.* 2015;11(11):e1004569.
- 774 7. Pastushenko I, Brisebarre A, Sifrim A, Fioramonti M, Revenco T, Boumahdi S, et al.  
775 Identification of the tumour transition states occurring during EMT. *Nature.* 2018.
- 776 8. Cieply B, Riley Pt, Pifer PM, Widmeyer J, Addison JB, Ivanov AV, et al. Suppression of the  
777 epithelial-mesenchymal transition by Grainyhead-like-2. *Cancer Res.* 2012;72(9):2440-53.
- 778 9. Cieply B, Farris J, Denvir J, Ford HL, Frisch SM. Epithelial-mesenchymal transition and  
779 tumor suppression are controlled by a reciprocal feedback loop between ZEB1 and  
780 Grainyhead-like-2. *Cancer Res.* 2013;73(20):6299-309.
- 781 10. Frisch SM, Farris JC, Pifer PM. Roles of Grainyhead-like transcription factors in cancer.  
782 *Oncogene.* 2017;36(44):6067-73.
- 783 11. Frausto RF, Le DJ, Aldave AJ. Transcriptomic Analysis of Cultured Corneal Endothelial  
784 Cells as a Validation for Their Use in Cell Replacement Therapy. *Cell Transplant.*  
785 2016;25(6):1159-76.
- 786 12. Weiss JS, Moller HU, Aldave AJ, Seitz B, Bredrup C, Kivela T, et al. IC3D classification of  
787 corneal dystrophies--edition 2. *Cornea.* 2015;34(2):117-59.
- 788 13. Davidson AE, Liskova P, Evans CJ, Dudakova L, Noskova L, Pontikos N, et al. Autosomal-  
789 Dominant Corneal Endothelial Dystrophies CHED1 and PPCD1 Are Allelic Disorders  
790 Caused by Non-coding Mutations in the Promoter of *OVOL2*. *Am J Hum Genet.*  
791 2016;98(1):75-89.
- 792 14. Le DJ, Chung DW, Frausto RF, Kim MJ, Aldave AJ. Identification of Potentially  
793 Pathogenic Variants in the Posterior Polymorphous Corneal Dystrophy 1 Locus. *PLoS One.*  
794 2016;11(6):e0158467.
- 795 15. Chung DD, Frausto RF, Cervantes AE, Gee KM, Zakharevich M, Hanser EM, et al.  
796 Confirmation of the *OVOL2* Promoter Mutation c.-307T>C in Posterior Polymorphous  
797 Corneal Dystrophy 1. *PLoS One.* 2017;12(1):e0169215.
- 798 16. Liskova P, Dudakova L, Evans CJ, Rojas Lopez KE, Pontikos N, Athanasiou D, et al.  
799 Ectopic *GRHL2* Expression Due to Non-coding Mutations Promotes Cell State Transition  
800 and Causes Posterior Polymorphous Corneal Dystrophy 4. *Am J Hum Genet.*  
801 2018;102(3):447-59.
- 802 17. Chung DD, Frausto RF, Lin BR, Hanser EM, Cohen Z, Aldave AJ. Transcriptomic Profiling  
803 of Posterior Polymorphous Corneal Dystrophy. *Invest Ophthalmol Vis Sci.*  
804 2017;58(7):3202-14.

## ZEB1 and corneal endothelial cell biology

- 805 18. Zakharevich M, Kattan JM, Chen JL, Lin BR, Cervantes AE, Chung DD, et al. Elucidating  
806 the molecular basis of PPCD: Effects of decreased ZEB1 expression on corneal endothelial  
807 cell function. *Mol Vis*. 2017;23:740-52.
- 808 19. Sanchez-Tillo E, Fanlo L, Siles L, Montes-Moreno S, Moros A, Chiva-Blanch G, et al. The  
809 EMT activator ZEB1 promotes tumor growth and determines differential response to  
810 chemotherapy in mantle cell lymphoma. *Cell Death Differ*. 2014;21(2):247-57.
- 811 20. Gu Y, Zhao Y, Zhou Y, Xie Y, Ju P, Long Y, et al. Zeb1 Is a Potential Regulator of Six2 in  
812 the Proliferation, Apoptosis and Migration of Metanephric Mesenchyme Cells. *Int J Mol Sci*.  
813 2016;17(8).
- 814 21. Eneling K, Brion L, Pinto V, Pinho MJ, Sznajder JI, Mochizuki N, et al. Salt-inducible  
815 kinase 1 regulates E-cadherin expression and intercellular junction stability. *FASEB J*.  
816 2012;26(8):3230-9.
- 817 22. Uzunhan Y, Bernard O, Marchant D, Dard N, Vanneaux V, Larghero J, et al. Mesenchymal  
818 stem cells protect from hypoxia-induced alveolar epithelial-mesenchymal transition. *Am J*  
819 *Physiol Lung Cell Mol Physiol*. 2016;310(5):L439-51.
- 820 23. Shyu HY, Ko CJ, Luo YC, Lin HY, Wu SR, Lan SW, et al. Ketamine Increases  
821 Permeability and Alters Epithelial Phenotype of Renal Distal Tubular Cells via a GSK-  
822 3beta-Dependent Mechanism. *J Cell Biochem*. 2016;117(4):881-93.
- 823 24. Schmedt T, Chen Y, Nguyen TT, Li S, Bonanno JA, Jurkunas UV. Telomerase  
824 immortalization of human corneal endothelial cells yields functional hexagonal monolayers.  
825 *PLoS One*. 2012;7(12):e51427.
- 826 25. Shieh SY, Ikeda M, Taya Y, Prives C. DNA damage-induced phosphorylation of p53  
827 alleviates inhibition by MDM2. *Cell*. 1997;91(3):325-34.
- 828 26. Zhang P, Sun Y, Ma L. ZEB1: at the crossroads of epithelial-mesenchymal transition,  
829 metastasis and therapy resistance. *Cell Cycle*. 2015;14(4):481-7.
- 830 27. Kaufhold S, Bonavida B. Central role of Snail1 in the regulation of EMT and resistance in  
831 cancer: a target for therapeutic intervention. *J Exp Clin Cancer Res*. 2014;33:62.
- 832 28. Zheng H, Kang Y. Multilayer control of the EMT master regulators. *Oncogene*.  
833 2014;33(14):1755-63.
- 834 29. Liu J, Wu Q, Wang Y, Wei Y, Wu H, Duan L, et al. *Ovol2* induces mesenchymal-epithelial  
835 transition via targeting ZEB1 in osteosarcoma. *Onco Targets Ther*. 2018;11:2963-73.
- 836 30. Roca H, Hernandez J, Weidner S, McEachin RC, Fuller D, Sud S, et al. Transcription factors  
837 *OVOL1* and *OVOL2* induce the mesenchymal to epithelial transition in human cancer.  
838 *PLoS One*. 2013;8(10):e76773.
- 839 31. Chen KH, Harris DL, Joyce NC. TGF-beta2 in aqueous humor suppresses S-phase entry in  
840 cultured corneal endothelial cells. *Invest Ophthalmol Vis Sci*. 1999;40(11):2513-9.
- 841 32. Soh YQ, Peh GSL, Mehta JS. Translational issues for human corneal endothelial tissue  
842 engineering. *J Tissue Eng Regen Med*. 2017;11(9):2425-42.
- 843 33. Peh GS, Chng Z, Ang HP, Cheng TY, Adnan K, Seah XY, et al. Propagation of human  
844 corneal endothelial cells: a novel dual media approach. *Cell Transplant*. 2015;24(2):287-304.
- 845 34. Roy O, Leclerc VB, Bourget JM, Theriault M, Proulx S. Understanding the process of  
846 corneal endothelial morphological change in vitro. *Invest Ophthalmol Vis Sci*.  
847 2015;56(2):1228-37.
- 848 35. Krenning G, Barauna VG, Krieger JE, Harmsen MC, Moonen JR. Endothelial Plasticity:  
849 Shifting Phenotypes through Force Feedback. *Stem Cells Int*. 2016;2016:9762959.
- 850 36. Yang Z, Sun B, Li Y, Zhao X, Zhao X, Gu Q, et al. ZEB2 promotes vasculogenic mimicry  
851 by TGF-beta1 induced epithelial-to-mesenchymal transition in hepatocellular carcinoma.  
852 *Exp Mol Pathol*. 2015;98(3):352-9.
- 853 37. Koeppel L. Klinische Beobachtungen mit der Nernstspaltlampe und dem  
854 Hornhautmikroskop. *Albrecht von Graefes Arch Ophthalmology*. 1916;91:375-9.

## ZEB1 and corneal endothelial cell biology

- 855 38. Gasset AR, Zimmerman TJ. Posterior polymorphous dystrophy associated with keratoconus.  
856 *Am J Ophthalmol.* 1974;78(3):535-7.
- 857 39. Lam HY, Wiggs JL, Jurkunus UV. Unusual presentation of presumed posterior  
858 polymorphous dystrophy associated with iris heterochromia, band keratopathy, and  
859 keratoconus. *Cornea.* 2010;29(10):1180-5.
- 860 40. Grayson M. The nature of hereditary deep polymorphous dystrophy of the cornea: its  
861 association with iris and anterior chamber dygenesis. *Trans Am Ophthalmol Soc.*  
862 1974;72:516-59.
- 863 41. Henriquez AS, Kenyon KR, Dohlman CH, Boruchoff SA, Forstot SL, Meyer RF, et al.  
864 Morphologic characteristics of posterior polymorphous dystrophy. A study of nine corneas  
865 and review of the literature. *Surv Ophthalmol.* 1984;29(2):139-47.
- 866 42. Krachmer JH. Posterior polymorphous corneal dystrophy: a disease characterized by  
867 epithelial-like endothelial cells which influence management and prognosis. *Trans Am*  
868 *Ophthalmol Soc.* 1985;83:413-75.
- 869 43. Boruchoff SA, Kuwabara T. Electron microscopy of posterior polymorphous degeneration.  
870 *Am J Ophthalmol.* 1971;72(5):879-87.
- 871 44. Rodrigues MM, Sun TT, Krachmer J, Newsome D. Epithelialization of the corneal  
872 endothelium in posterior polymorphous dystrophy. *Invest Ophthalmol Vis Sci.*  
873 1980;19(7):832-5.
- 874 45. Jirsova K, Merjava S, Martincova R, Gwilliam R, Ebenezer ND, Liskova P, et al.  
875 Immunohistochemical characterization of cytokeratins in the abnormal corneal endothelium  
876 of posterior polymorphous corneal dystrophy patients. *Exp Eye Res.* 2007;84(4):680-6.
- 877 46. Mendez MG, Kojima S, Goldman RD. Vimentin induces changes in cell shape, motility, and  
878 adhesion during the epithelial to mesenchymal transition. *FASEB J.* 2010;24(6):1838-51.
- 879 47. Friedl P, Wolf K. Plasticity of cell migration: a multiscale tuning model. *J Cell Biol.*  
880 2010;188(1):11-9.
- 881 48. Lee JM, Dedhar S, Kalluri R, Thompson EW. The epithelial-mesenchymal transition: new  
882 insights in signaling, development, and disease. *J Cell Biol.* 2006;172(7):973-81.
- 883 49. Gal A, Sjoblom T, Fedorova L, Imreh S, Beug H, Moustakas A. Sustained TGF beta  
884 exposure suppresses Smad and non-Smad signalling in mammary epithelial cells, leading to  
885 EMT and inhibition of growth arrest and apoptosis. *Oncogene.* 2008;27(9):1218-30.
- 886 50. Bonanno JA. Molecular mechanisms underlying the corneal endothelial pump. *Exp Eye Res.*  
887 2012;95(1):2-7.
- 888 51. Fischbarg J. Fluid transport across leaky epithelia: central role of the tight junction and  
889 supporting role of aquaporins. *Physiol Rev.* 2010;90(4):1271-90.
- 890 52. Aldave AJ, Han J, Frausto RF. Genetics of the corneal endothelial dystrophies: an evidence-  
891 based review. *Clin Genet.* 2013;84(2):109-19.
- 892 53. Nguyen TT, Bonanno JA. Lactate-H(+) transport is a significant component of the in vivo  
893 corneal endothelial pump. *Invest Ophthalmol Vis Sci.* 2012;53(4):2020-9.
- 894 54. Ran FA, Hsu PD, Wright J, Agarwala V, Scott DA, Zhang F. Genome engineering using the  
895 CRISPR-Cas9 system. *Nat Protoc.* 2013;8(11):2281-308.
- 896 55. Dehairs J, Talebi A, Cherifi Y, Swinnen JV. CRISP-ID: decoding CRISPR mediated indels  
897 by Sanger sequencing. *Sci Rep.* 2016;6:28973.
- 898 56. Bray NL, Pimentel H, Melsted P, Pachter L. Near-optimal probabilistic RNA-seq  
899 quantification. *Nat Biotechnol.* 2016;34(5):525-7.
- 900 57. Pimentel H, Bray NL, Puente S, Melsted P, Pachter L. Differential analysis of RNA-seq  
901 incorporating quantification uncertainty. *Nat Methods.* 2017;14(7):687-90.
- 902 58. Rivals I, Personnaz L, Taing L, Potier MC. Enrichment or depletion of a GO category within  
903 a class of genes: which test? *Bioinformatics.* 2007;23(4):401-7.
- 904 59. Wang M, Zhao Y, Zhang B. Efficient Test and Visualization of Multi-Set Intersections. *Sci*  
905 *Rep.* 2015;5:16923.



## ZEB1 and corneal endothelial cell biology

- 906 60. Spandidos A, Wang X, Wang H, Seed B. PrimerBank: a resource of human and mouse PCR  
907 primer pairs for gene expression detection and quantification. *Nucleic Acids Res.*  
908 2010;38(Database issue):D792-9.
- 909 61. Spandidos A, Wang X, Wang H, Dragnev S, Thurber T, Seed B. A comprehensive  
910 collection of experimentally validated primers for Polymerase Chain Reaction quantitation  
911 of murine transcript abundance. *BMC Genomics.* 2008;9:633.
- 912 62. Wang X, Seed B. A PCR primer bank for quantitative gene expression analysis. *Nucleic*  
913 *Acids Res.* 2003;31(24):e154.
- 914 63. Livak KJ, Schmittgen TD. Analysis of relative gene expression data using real-time  
915 quantitative PCR and the 2(-Delta Delta C(T)) Method. *Methods.* 2001;25(4):402-8.
- 916 64. Stolwijk JA, Matrougui K, Renken CW, Trebak M. Impedance analysis of GPCR-mediated  
917 changes in endothelial barrier function: overview and fundamental considerations for stable  
918 and reproducible measurements. *Pflugers Arch.* 2015;467(10):2193-218.
- 919 65. Kao L, Azimov R, Shao XM, Frausto RF, Abuladze N, Newman D, et al. Multifunctional  
920 ion transport properties of human SLC4A11: comparison of the SLC4A11-B and SLC4A11-  
921 C variants. *Am J Physiol Cell Physiol.* 2016;311(5):C820-C30.  
922
